# Supplementary material for: Synthesis and steroid sulfatase inhibitory activities of N-alkanoyl tyramine phosphates and thiophosphates
Source: Royal Society of Chemistry journal article supplement (doi:10.1039/c5ra01614b), 2015-01-01
Supplement: c5ra01614b1.pdf [file c5ra01614b1.pdf]

## Supporting Information for “Synthesis and steroid sulfatase inhibitory activities of *N*-alkanoyl tyramine phosphates and thiophosphates “

Witold Kozak,<sup>a</sup> Mateusz Daško,<sup>a</sup> Agnieszka Wołos,<sup>a</sup> Maciej Masłyk,<sup>b</sup> Konrad Kubiński,<sup>b</sup> Andrzej Składanowski,<sup>c</sup> Majus Misiak,<sup>c</sup> Janusz Rachon,<sup>a</sup> and Sebastian Demkowicz\*<sup>a</sup>

<sup>a</sup> Department of Organic Chemistry, Chemical Faculty, Gdansk University of Technology, Narutowicza 11/12, 80-233 Gdansk, Poland

<sup>b</sup> Department of Molecular Biology, Faculty of Biotechnology and Environment Sciences, The John Paul II Catholic University of Lublin, Konstantynów 1i, 20-708 Lublin, Poland

<sup>c</sup> Department of Pharmaceutical Technology and Biochemistry, Chemical Faculty, Gdansk University of Technology, Narutowicza 11/12, 80-233 Gdansk, Poland

|                                                                                                                           |         |
|---------------------------------------------------------------------------------------------------------------------------|---------|
| Table of contentst                                                                                                        | S1      |
| <sup>1</sup> H NMR and <sup>13</sup> C NMR for <i>N</i> -alkanoyl tyramine derivatives <b>2a-2c</b> :                     |         |
| <b>2a</b>                                                                                                                 | S2-S3   |
| <b>2b</b>                                                                                                                 | S4-S5   |
| <b>2c</b>                                                                                                                 | S6-S7   |
| <sup>1</sup> H NMR, <sup>13</sup> C NMR, <sup>31</sup> P NMR for dimethyl phosphate derivatives <b>4a-4c</b> :            |         |
| <b>4a</b>                                                                                                                 | S8-S10  |
| <b>4b</b>                                                                                                                 | S11-S13 |
| <b>4c</b>                                                                                                                 | S14-S16 |
| <sup>1</sup> H NMR, <sup>13</sup> C NMR, <sup>31</sup> P NMR for dimethyl thiophosphate derivatives <b>4a'-4c'</b> :      |         |
| <b>4a'</b>                                                                                                                | S17-S19 |
| <b>4b'</b>                                                                                                                | S20-S22 |
| <b>4c'</b>                                                                                                                | S23-S25 |
| <sup>1</sup> H NMR, <sup>13</sup> C NMR, <sup>31</sup> P NMR for methyl phosphoroamidate derivatives <b>4d-4f</b> :       |         |
| <b>4d</b>                                                                                                                 | S26-S28 |
| <b>4e</b>                                                                                                                 | S29-S31 |
| <b>4f</b>                                                                                                                 | S32-S34 |
| <sup>1</sup> H NMR, <sup>13</sup> C NMR, <sup>31</sup> P NMR for methyl thiophosphoroamidate derivatives <b>4d'-4f'</b> : |         |
| <b>4d'</b>                                                                                                                | S35-S37 |
| <b>4e'</b>                                                                                                                | S38-S40 |
| <b>4f'</b>                                                                                                                | S41-S43 |
| <sup>1</sup> H NMR, <sup>13</sup> C NMR, <sup>31</sup> P NMR for phosphoric acid derivatives <b>5a-5c</b> :               |         |
| <b>5a</b>                                                                                                                 | S44-S46 |
| <b>5b</b>                                                                                                                 | S47-S49 |
| <b>5c</b>                                                                                                                 | S50-S52 |

**$^1\text{H}$  NMR**

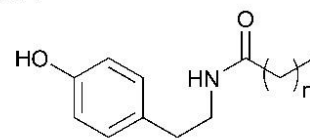

n= 10, **2a**

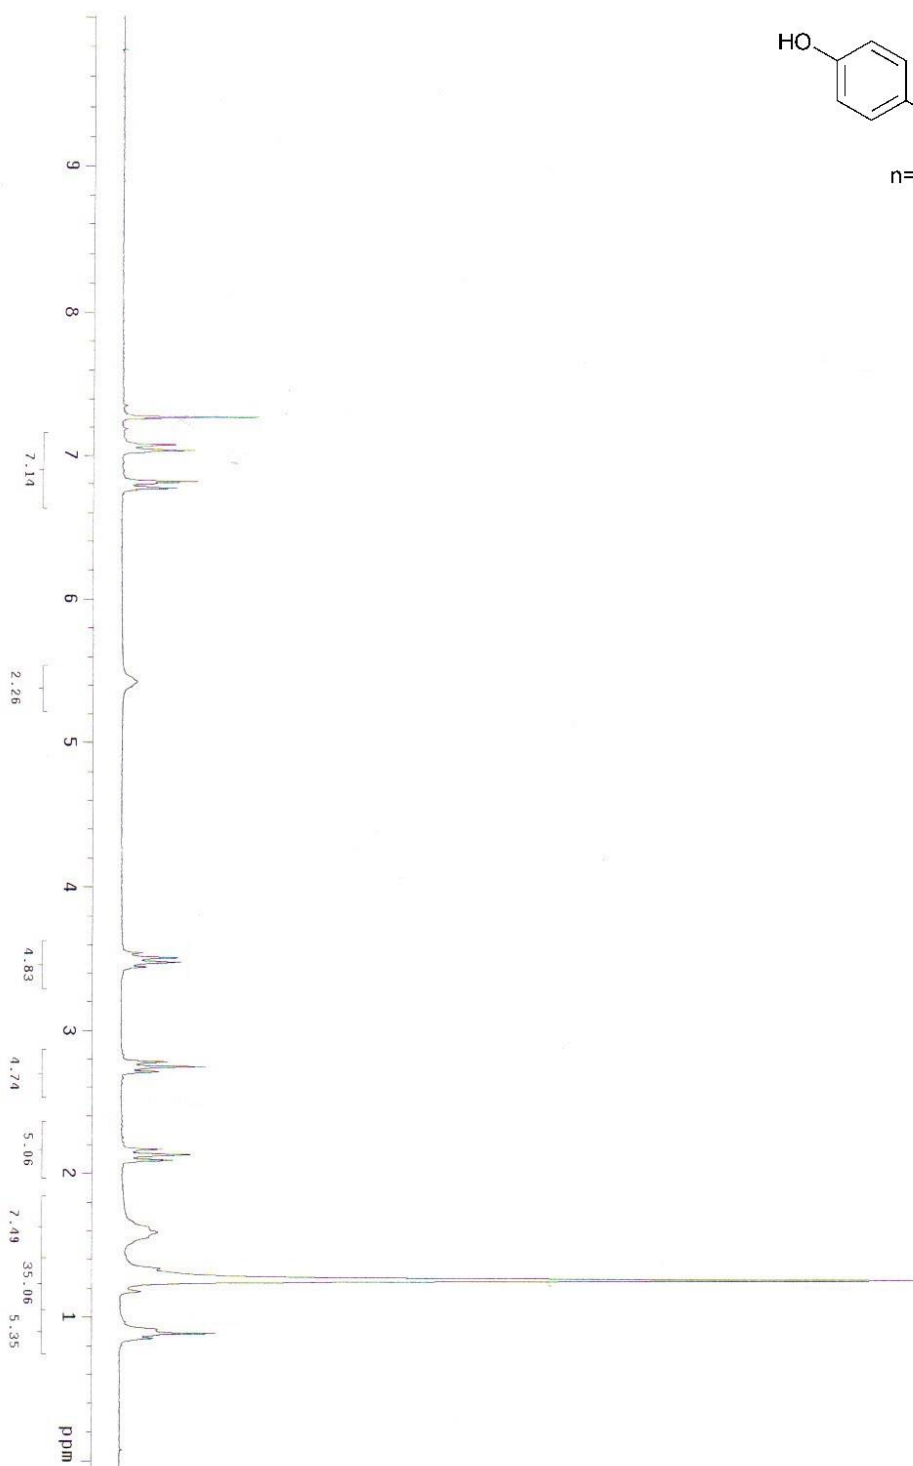

**$^{13}\text{C}$  NMR**

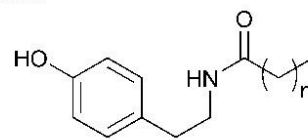

n = 10, **2a**

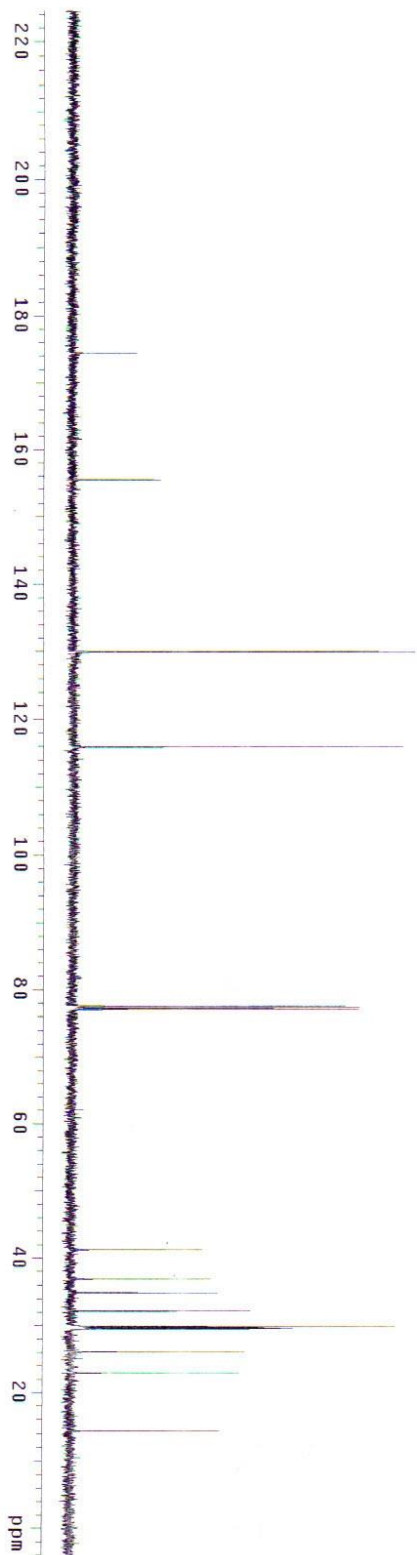

**$^1\text{H}$  NMR**

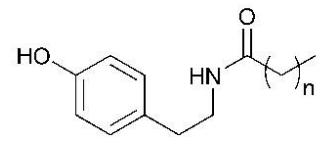

n = 11, **2b**

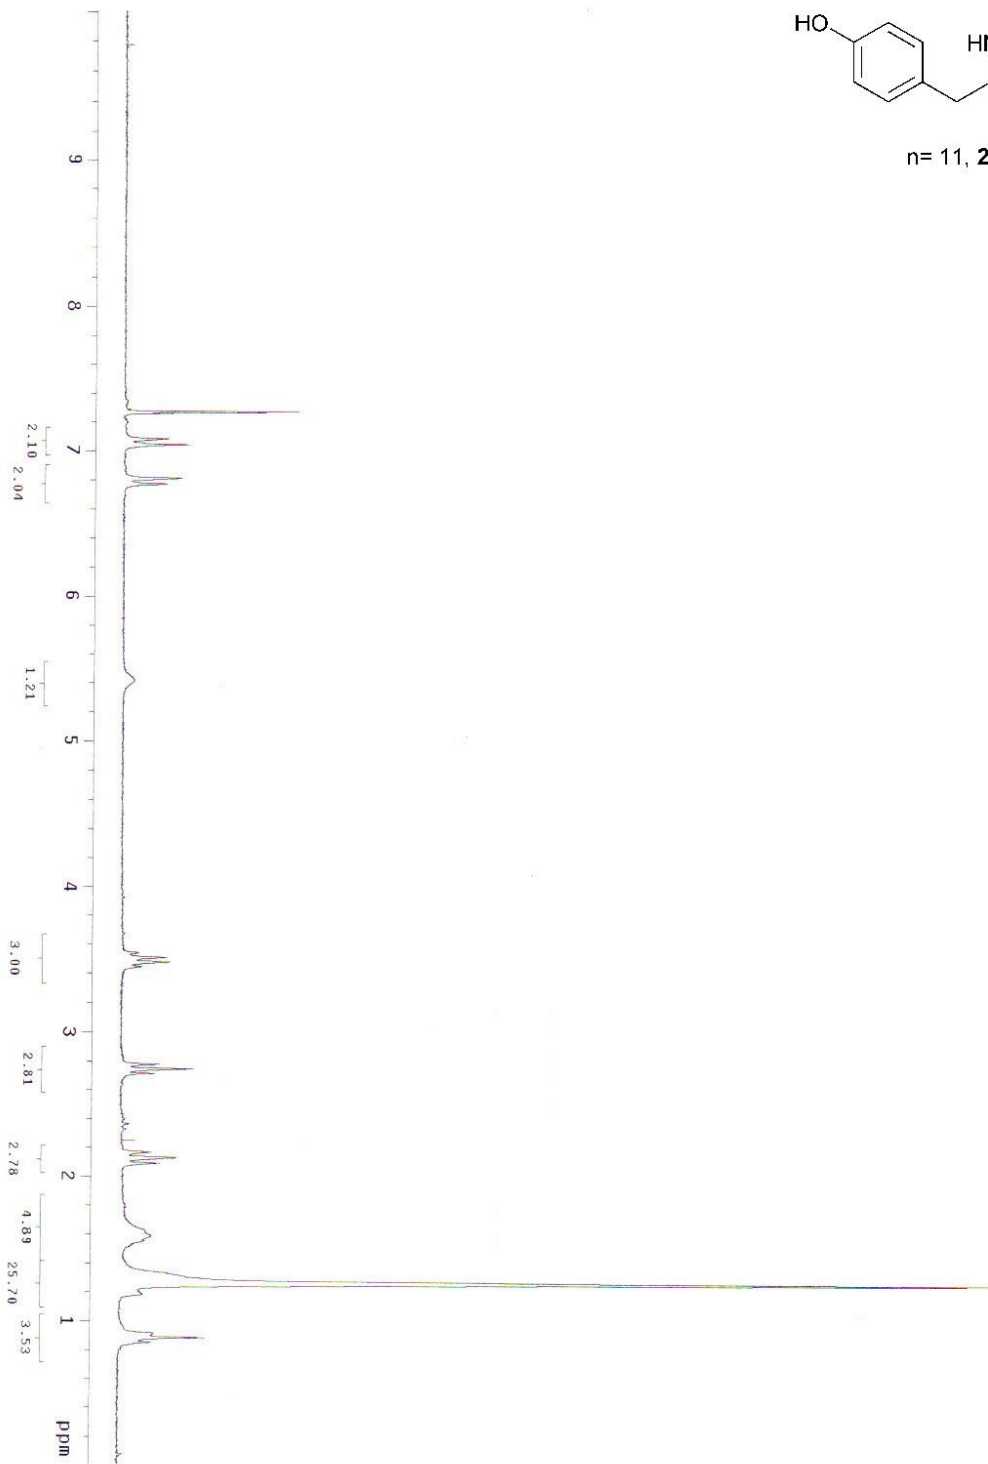

**$^{13}\text{C}$  NMR**

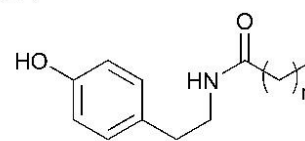

n = 11, **2b**

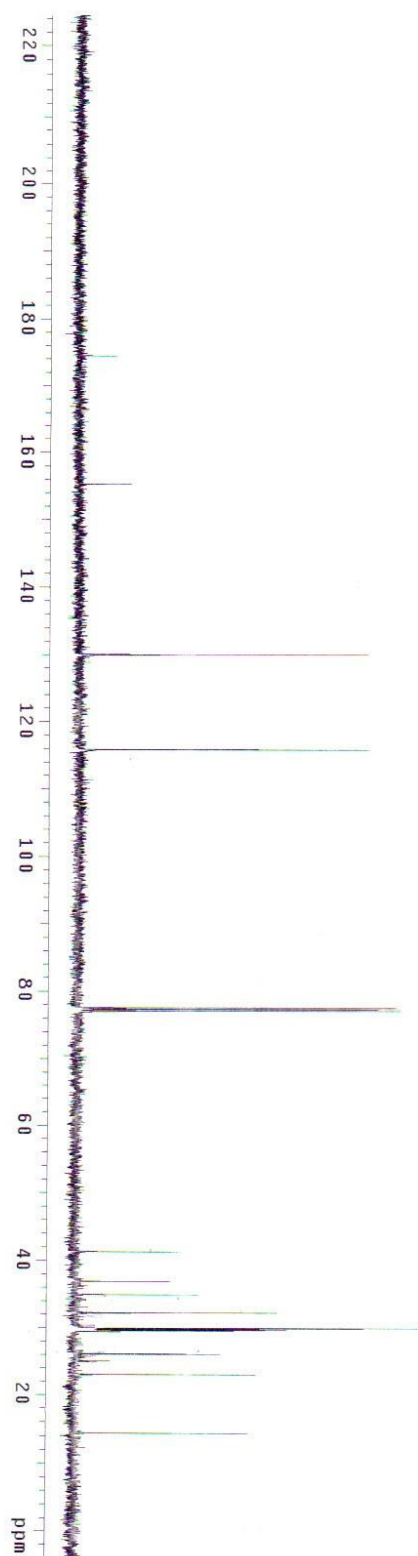

<sup>1</sup>H NMR

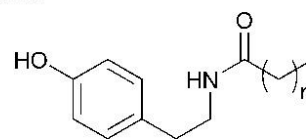

n = 12, **2c**

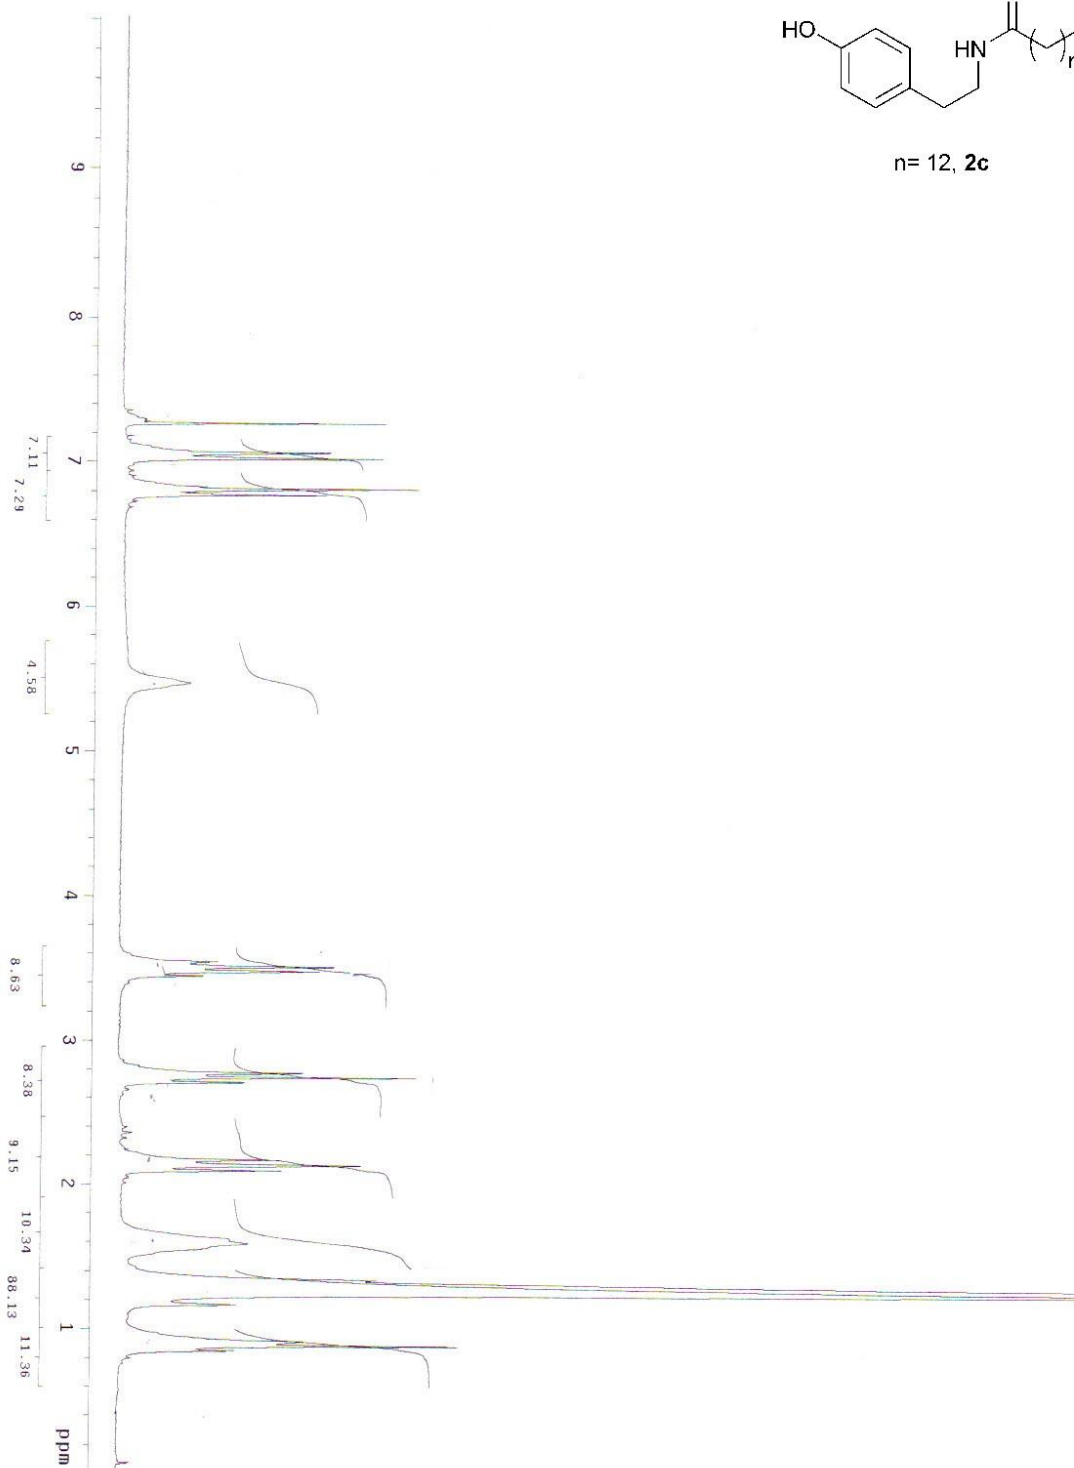

<sup>13</sup>C NMR

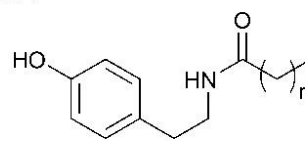

n = 12, **2c**

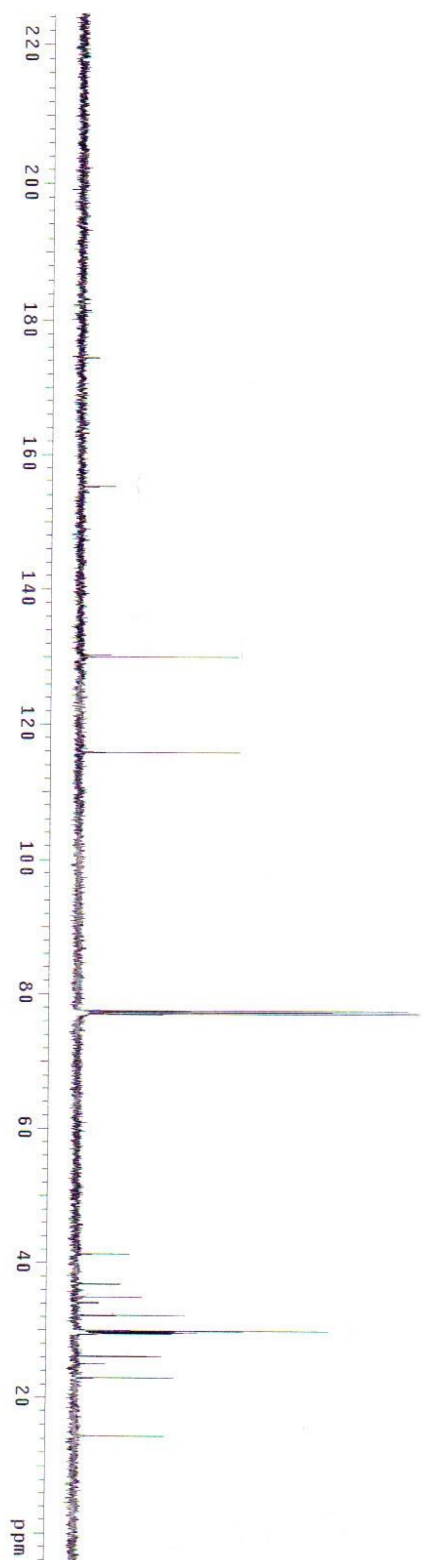

# <sup>1</sup>H NMR

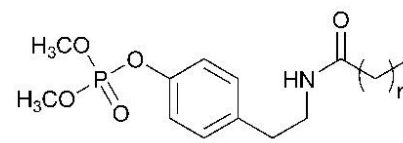

n = 10, **4a**

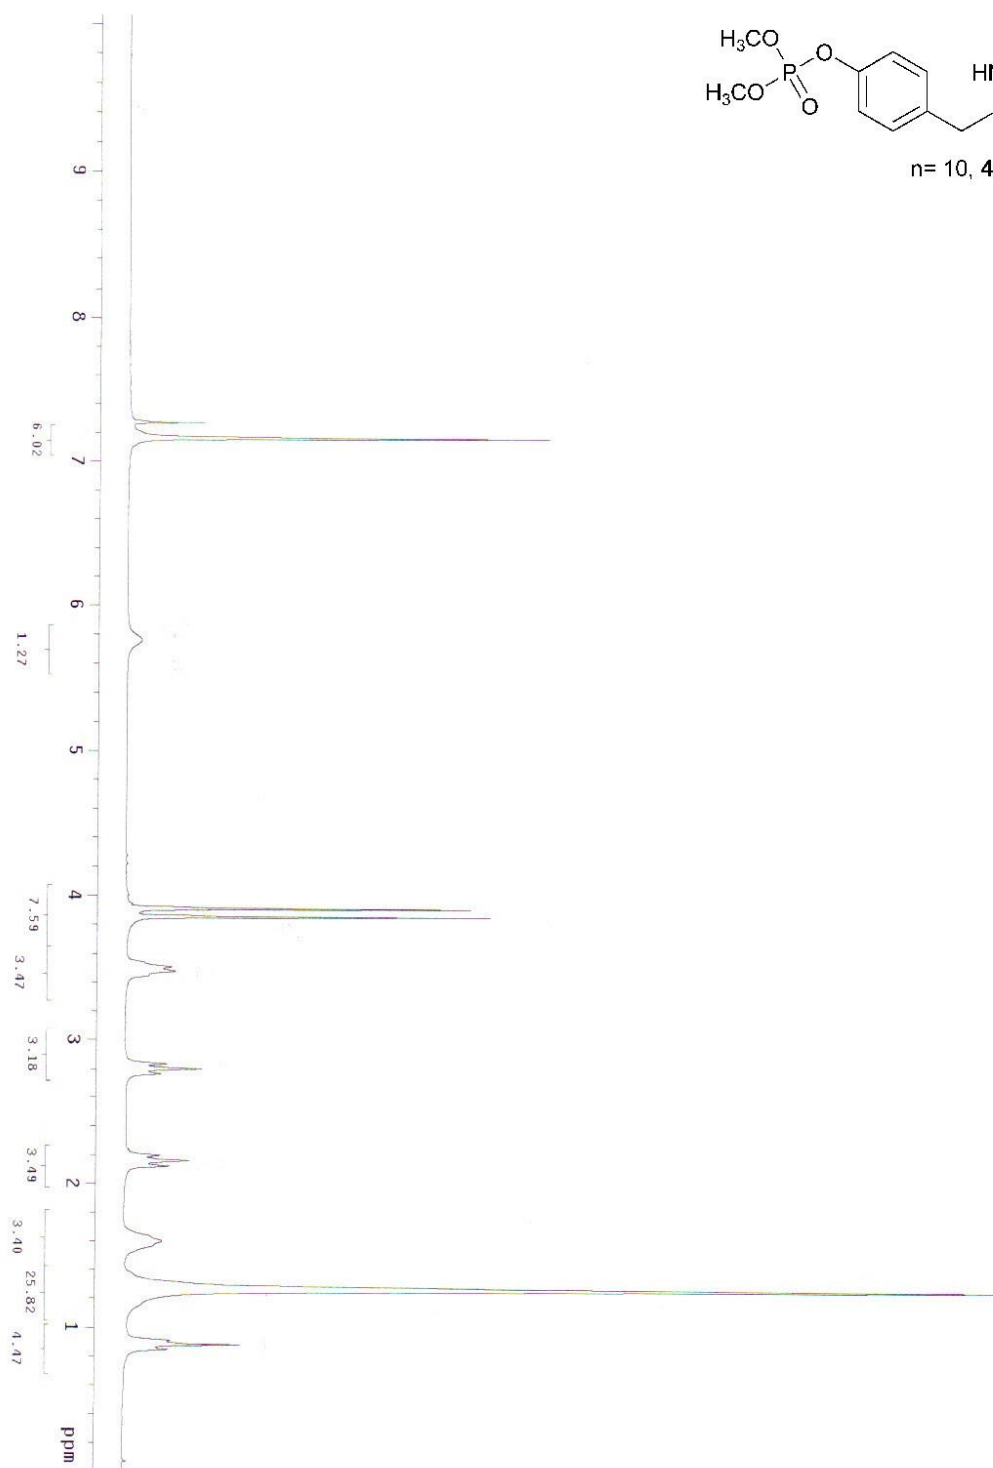



# <sup>13</sup>C NMR

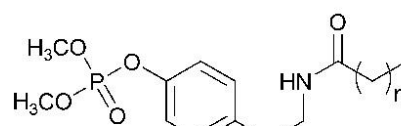

n = 10, 4a

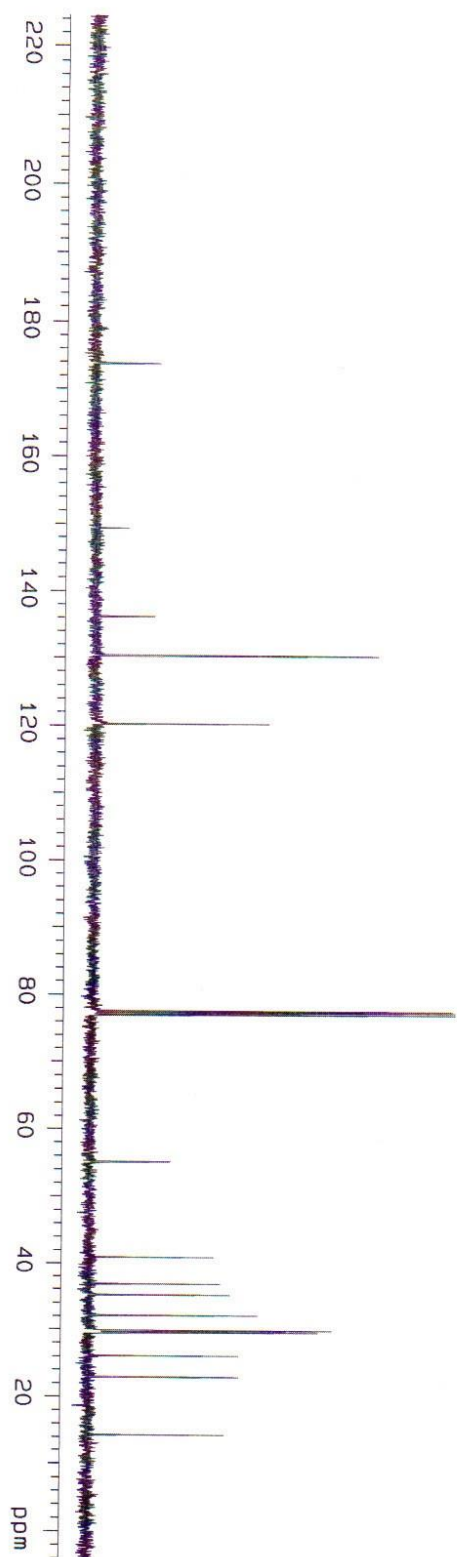

### <sup>31</sup>P NMR

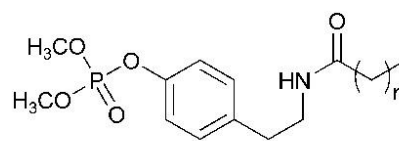

n = 10, **4a**

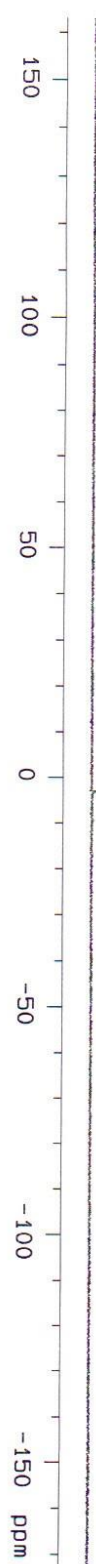

| INDEX | FREQUENCY | PPM    | HEIGHT |
|-------|-----------|--------|--------|
| 1     | -584.996  | -2.891 | 14.4   |

# <sup>1</sup>H NMR

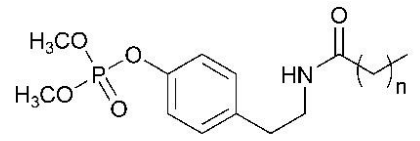

n = 11, **4b**

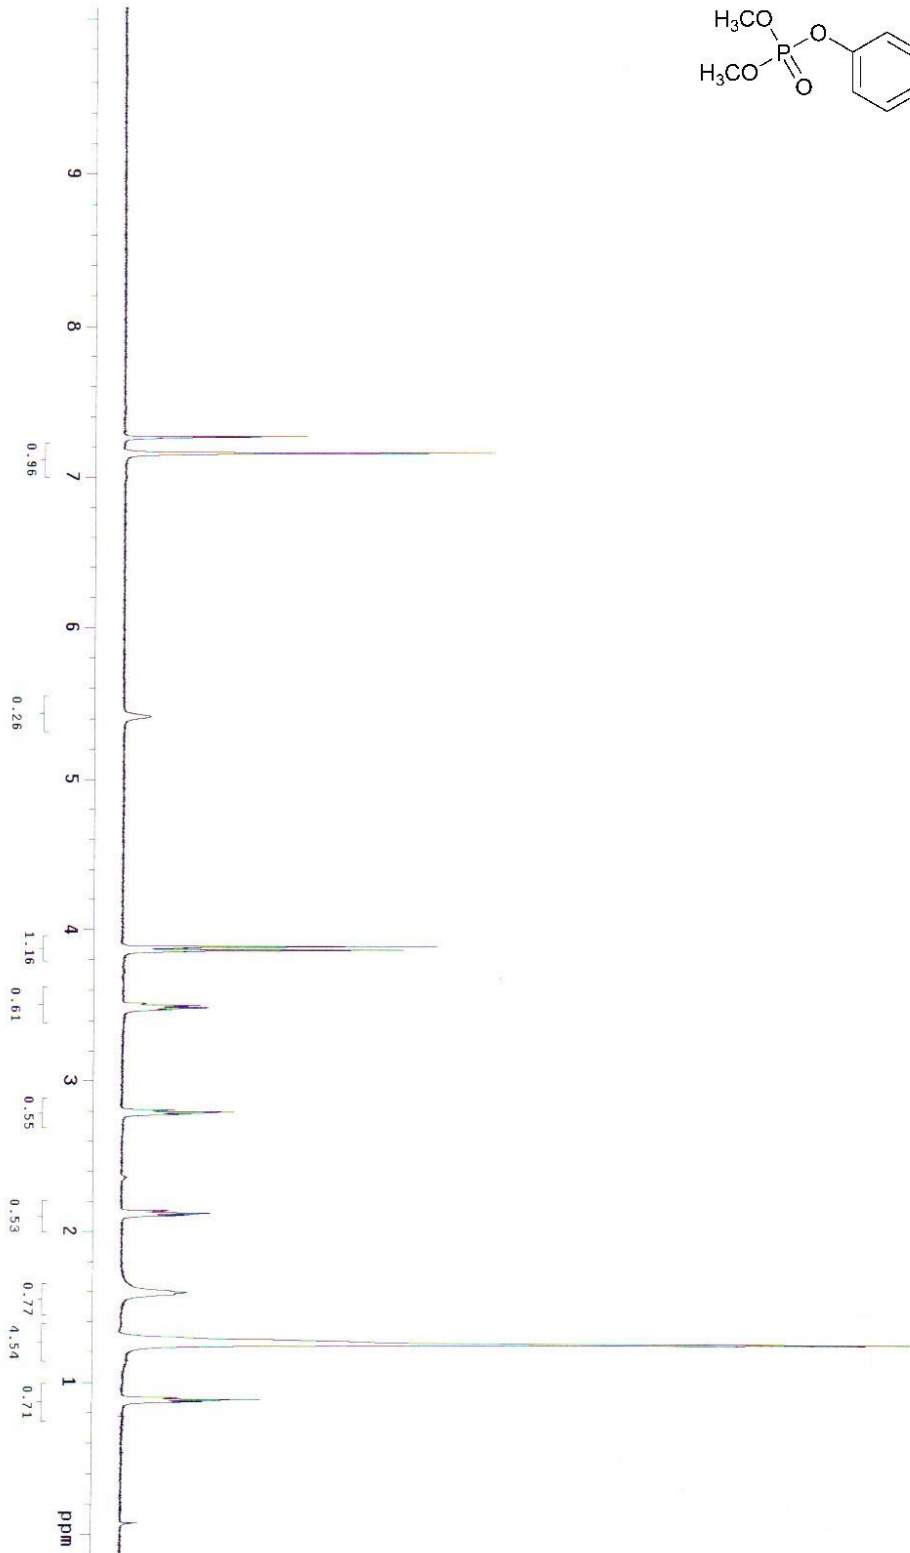

**<sup>13</sup>C NMR**

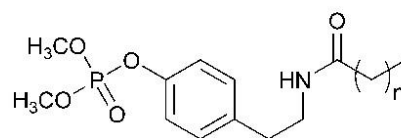

n= 11, **4b**

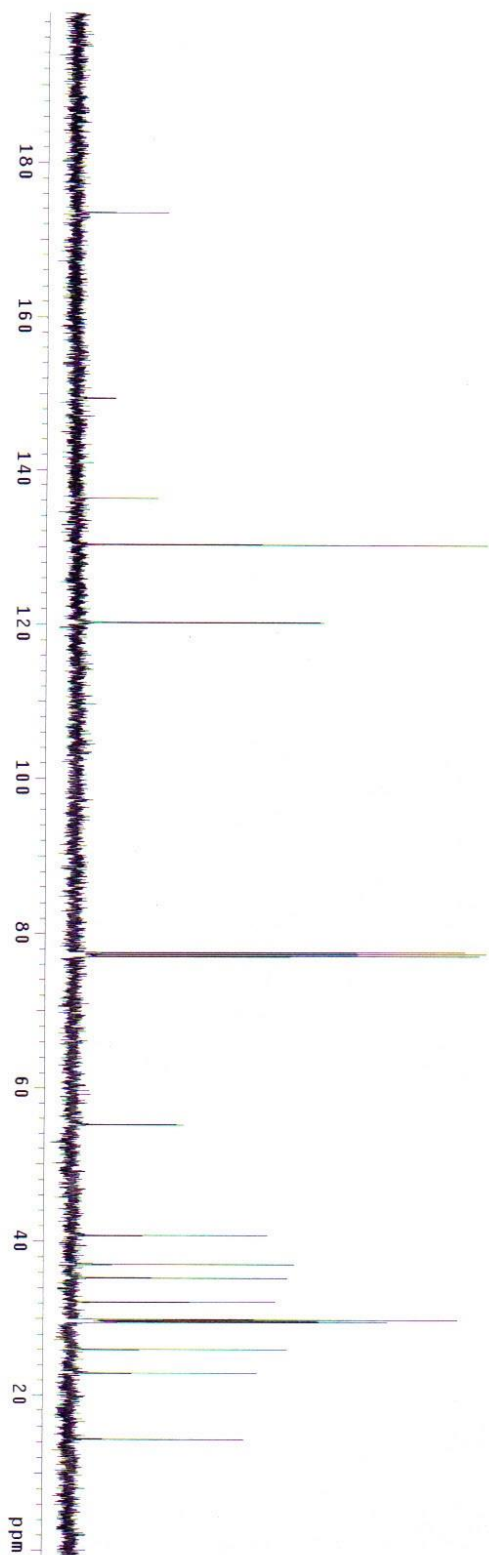

### <sup>31</sup>P NMR

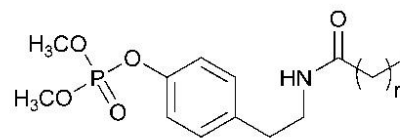

n = 11, 4b

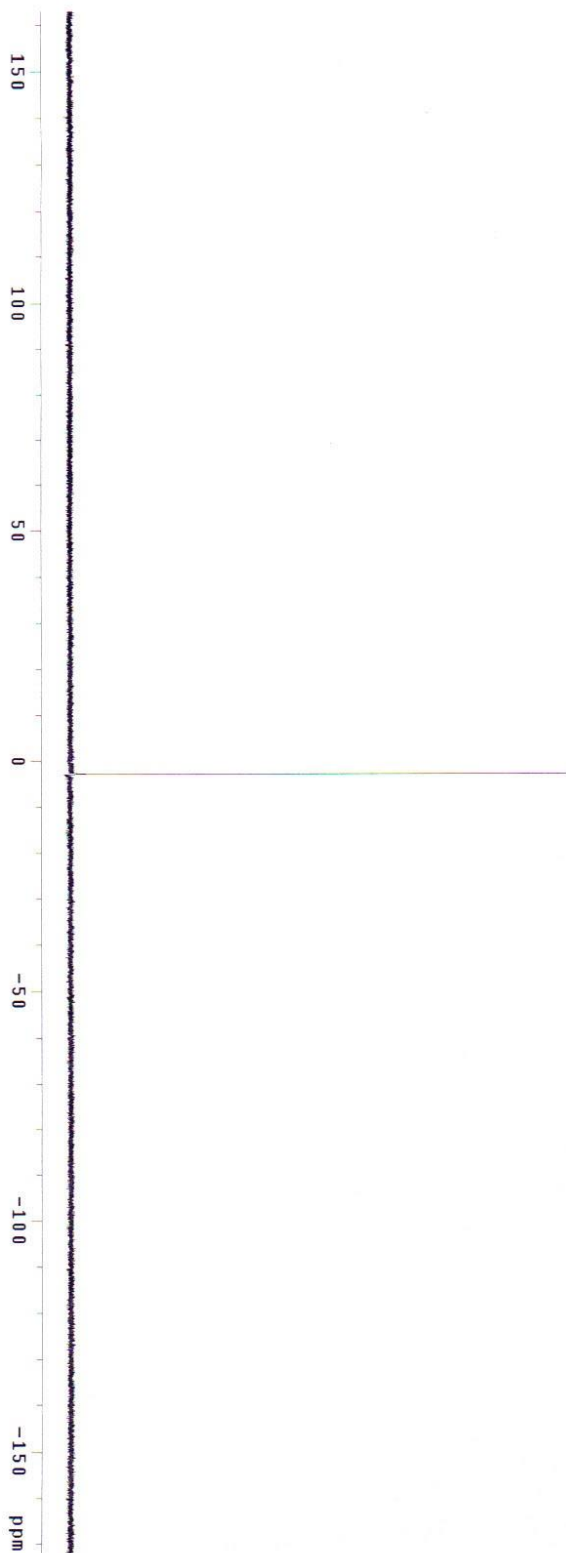

| INDEX | FREQUENCY | PPM    | HEIGHT |
|-------|-----------|--------|--------|
| 1     | -579.806  | -2.866 | 31.9   |

# <sup>1</sup>H NMR

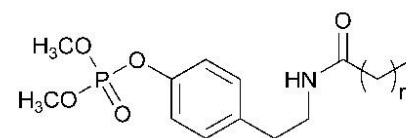

n = 12, **4c**

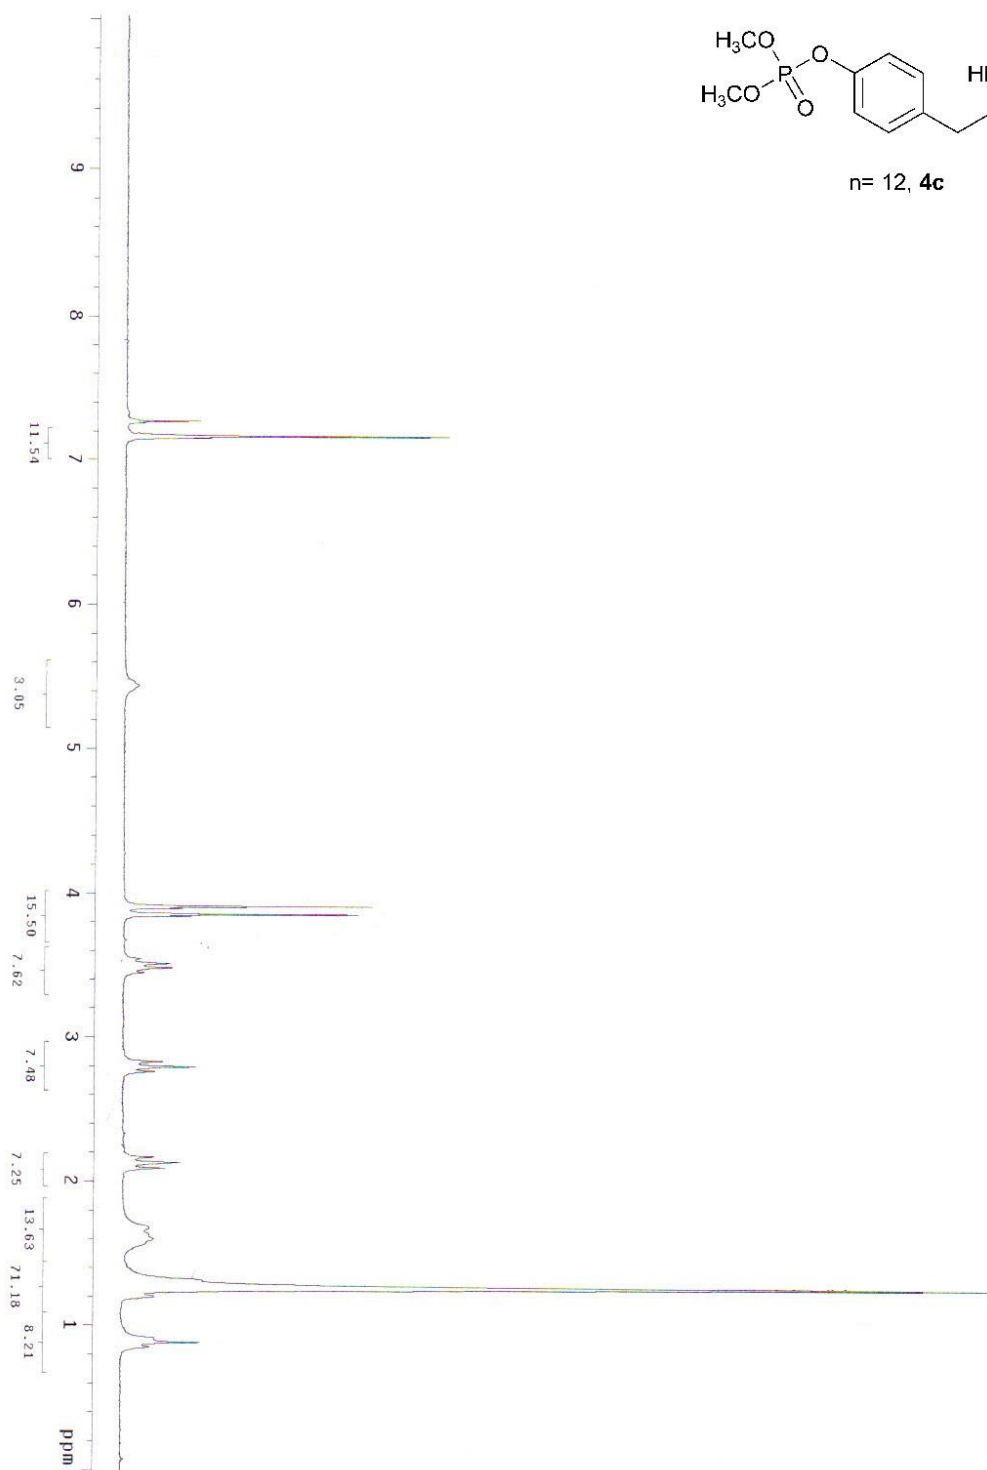

# <sup>13</sup>C NMR

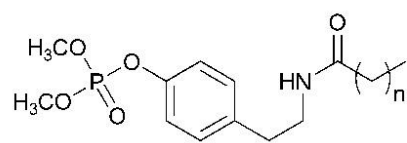

n = 12, 4c

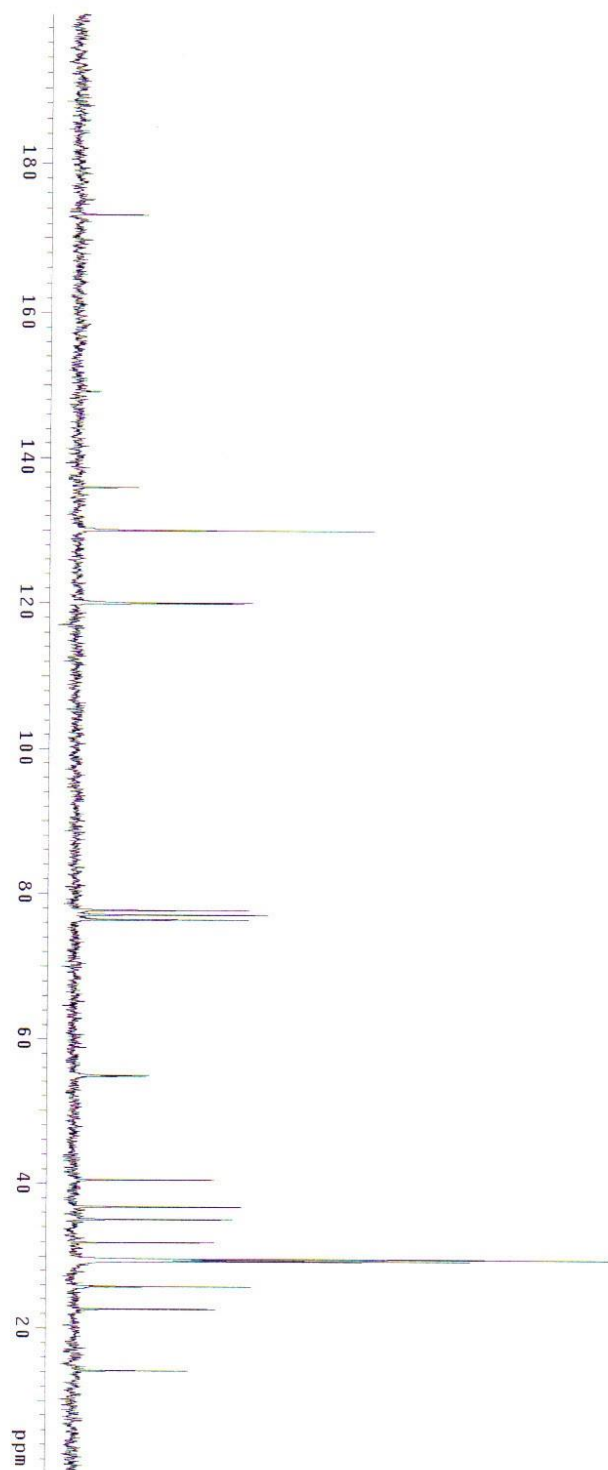

### <sup>31</sup>P NMR

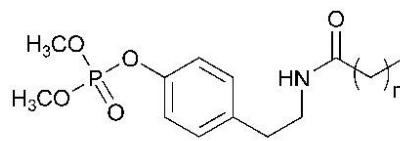

n = 12, **4c**

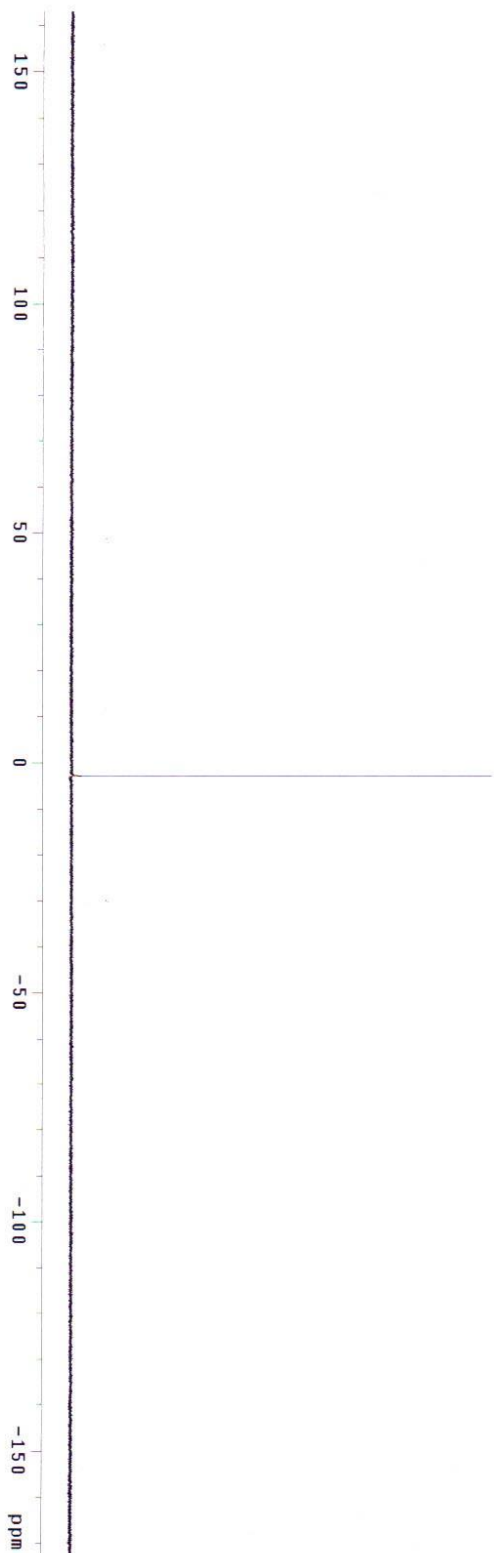

| INDEX | FREQUENCY | PPM    | HEIGHT |
|-------|-----------|--------|--------|
| 1     | -580.844  | -2.871 | 42.0   |



# <sup>1</sup>H NMR

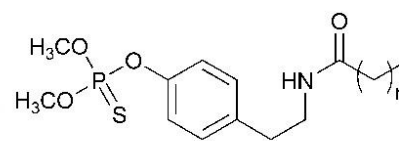

n = 10, 4a'

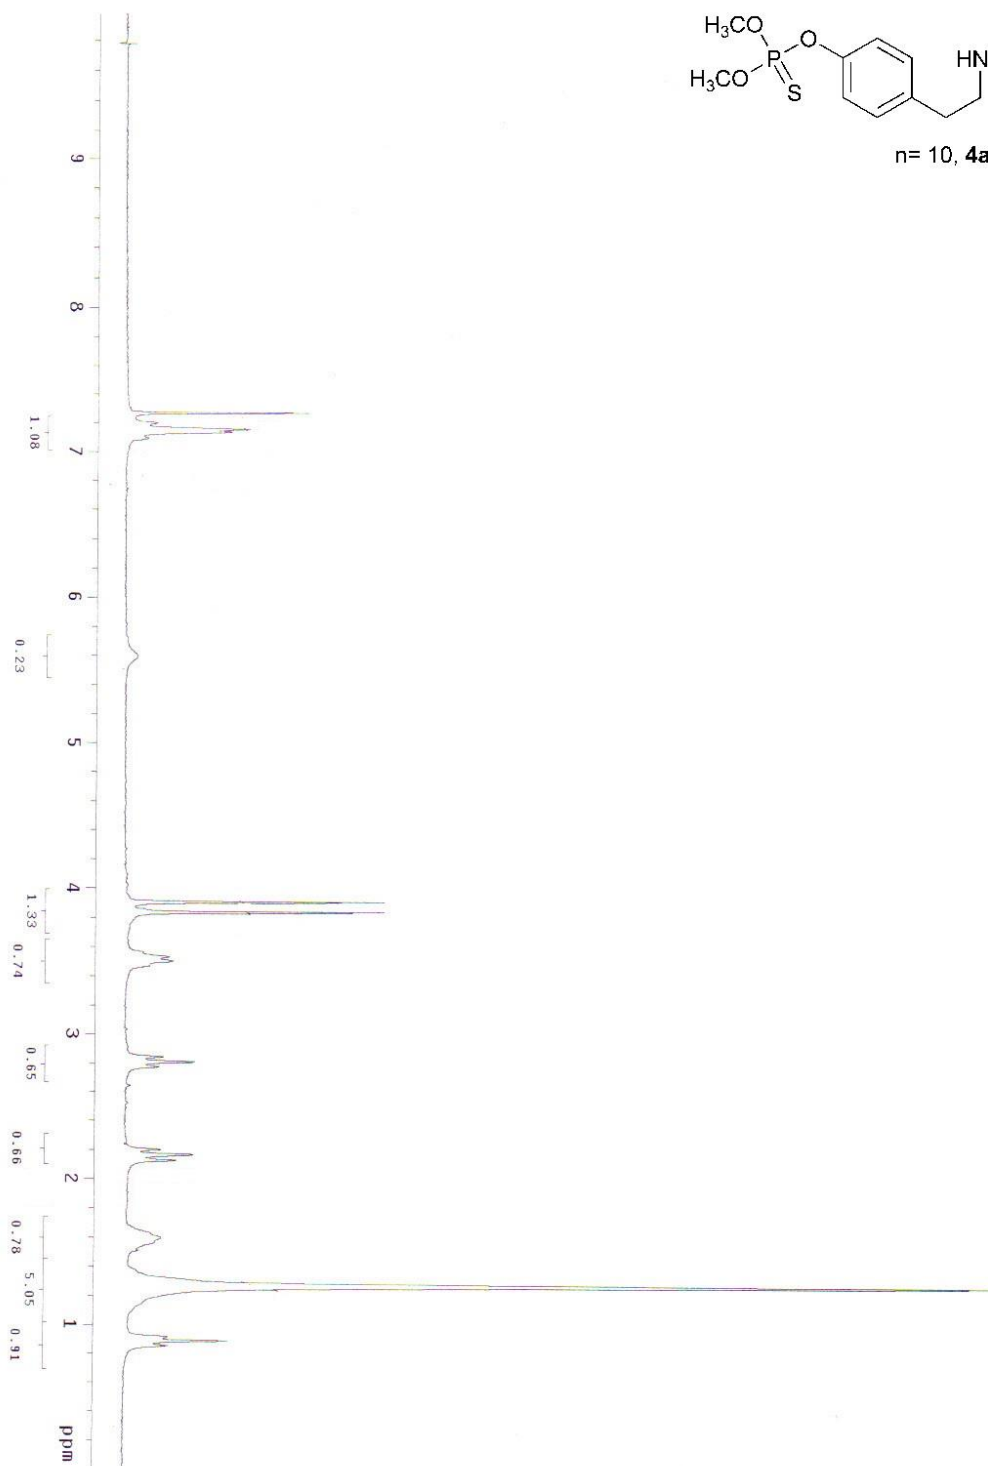

**<sup>13</sup>C NMR**

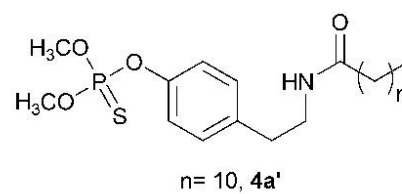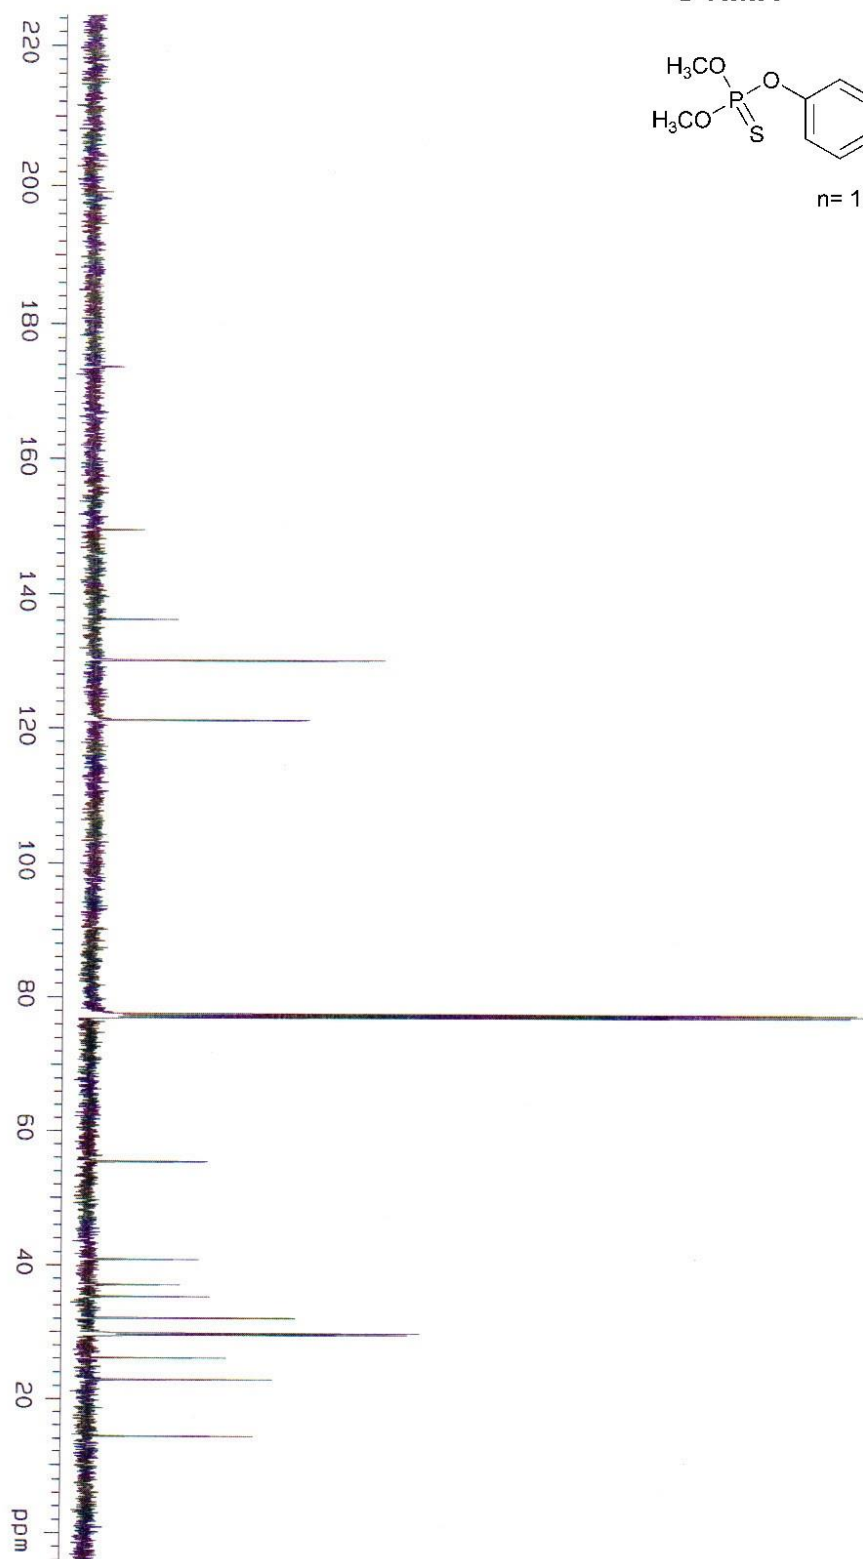

### <sup>31</sup>P NMR

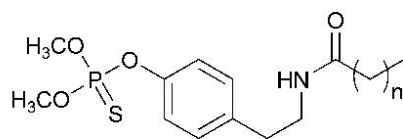

n = 10, **4a'**

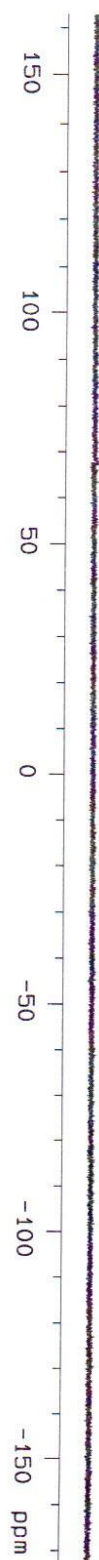

| INDEX | FREQUENCY | PPM    | HEIGHT |
|-------|-----------|--------|--------|
| 1     | 13700.355 | 57.714 | 10.4   |

**<sup>1</sup>H NMR**

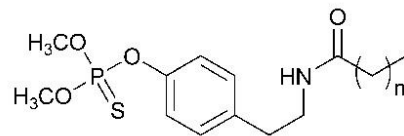

n = 11, 4b'

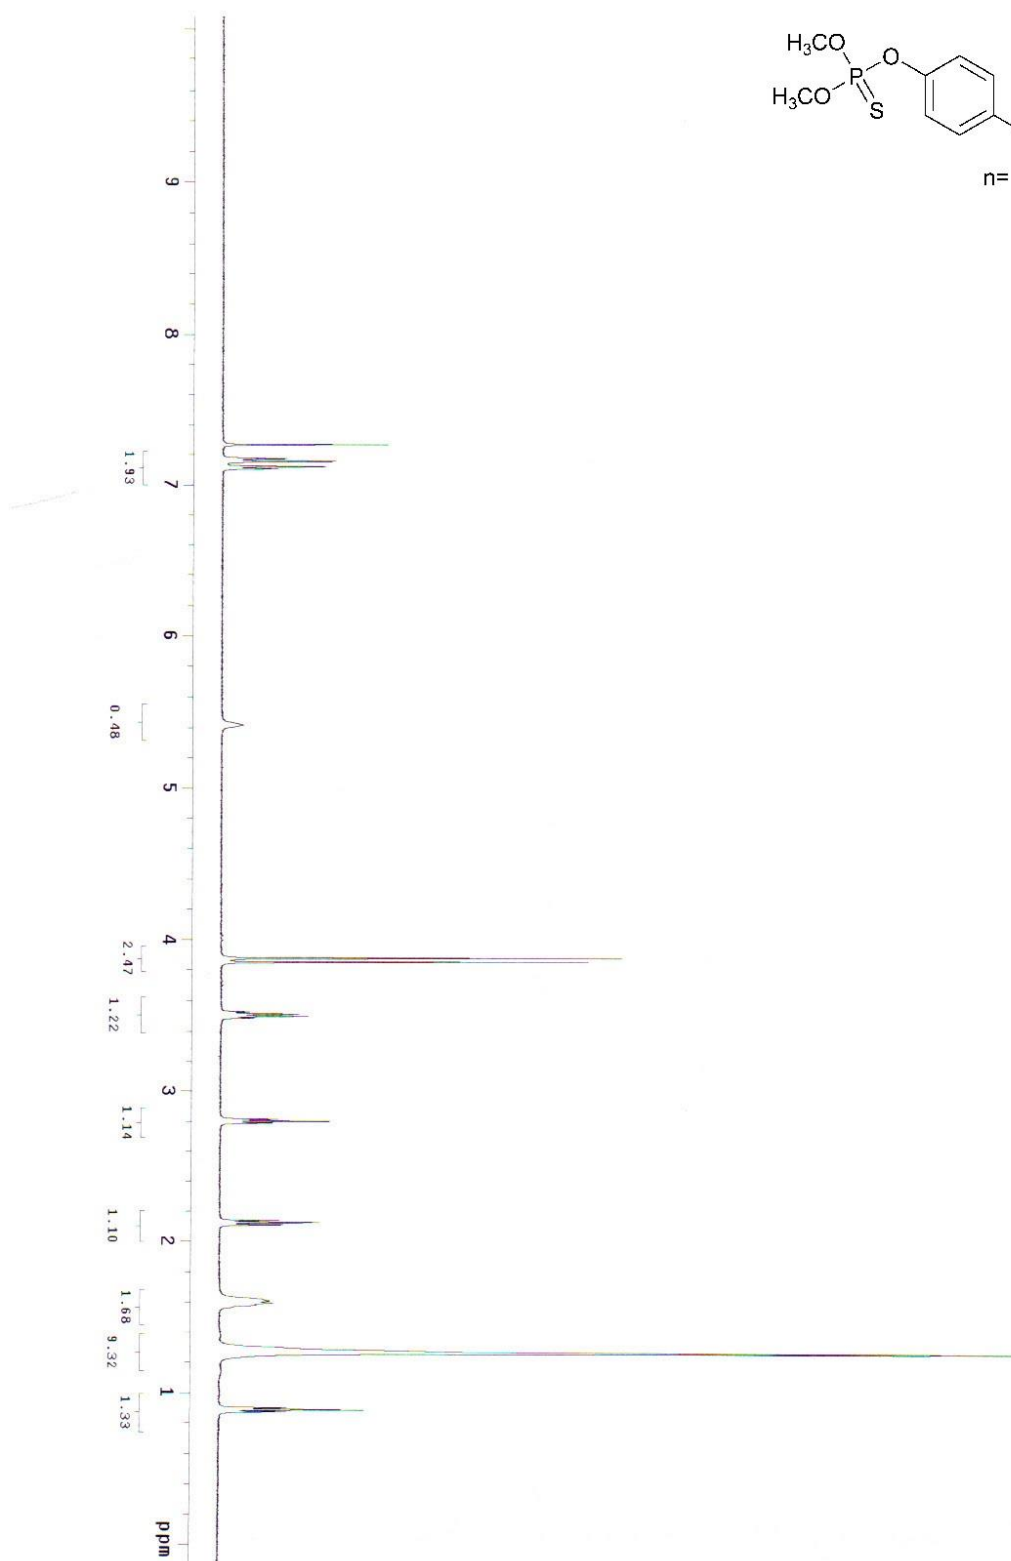

**$^{13}\text{C}$  NMR**

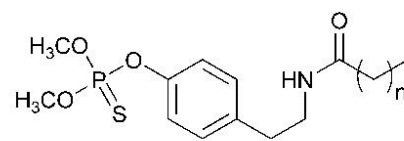

n = 11, 4b'

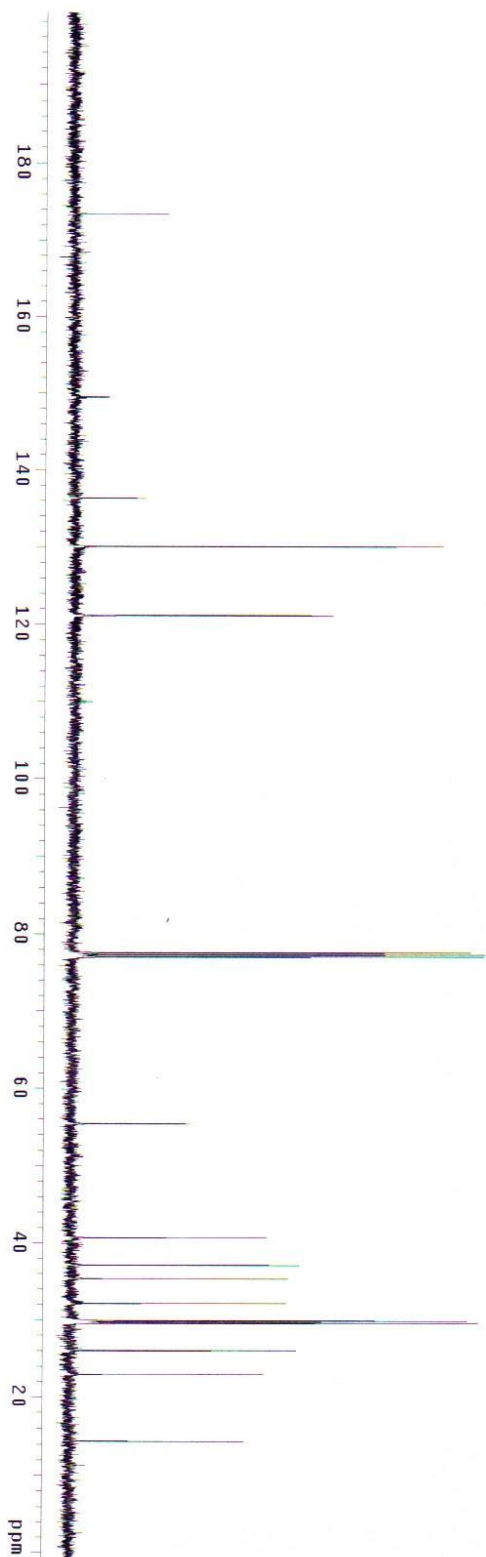

### $^{31}\text{P}$ NMR

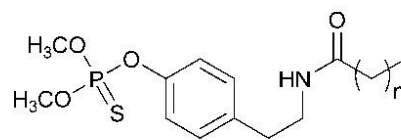

n = 11, 4b'

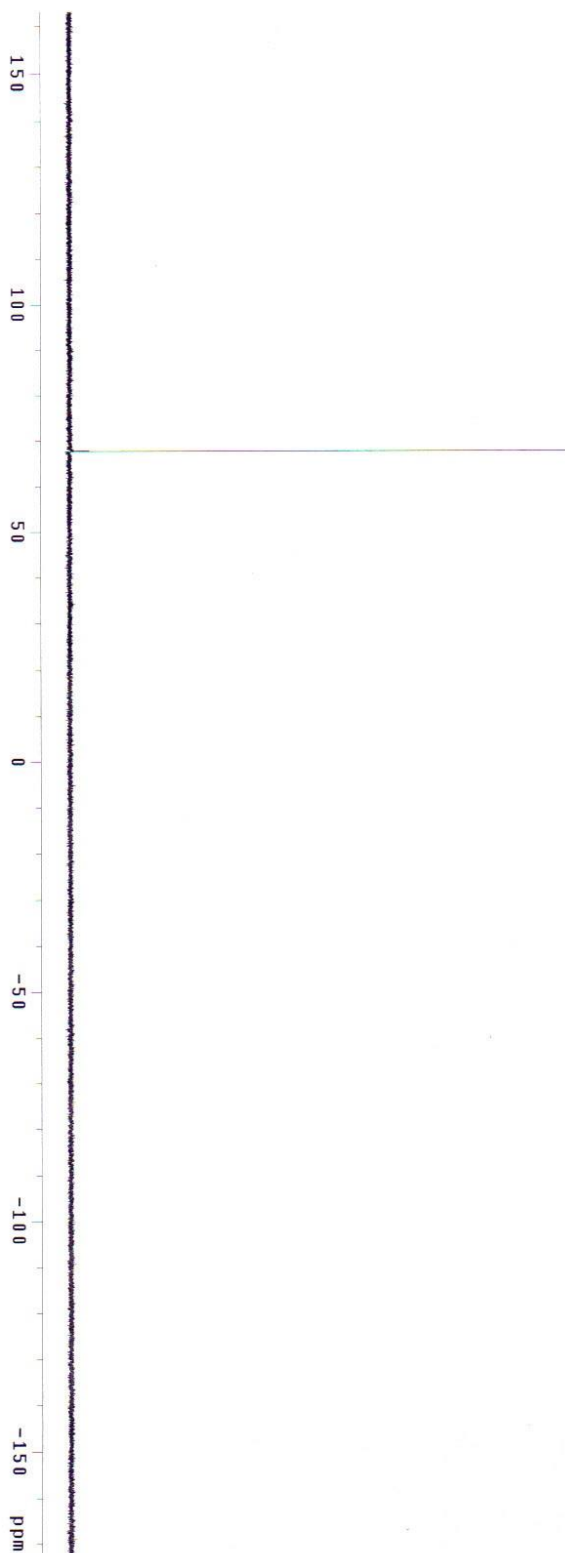

| INDEX | FREQUENCY | PPM    | HEIGHT |
|-------|-----------|--------|--------|
| 1     | 13700.355 | 67.714 | 34.8   |

# <sup>1</sup>H NMR

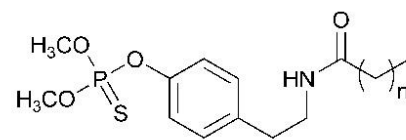

n = 12, 4c'

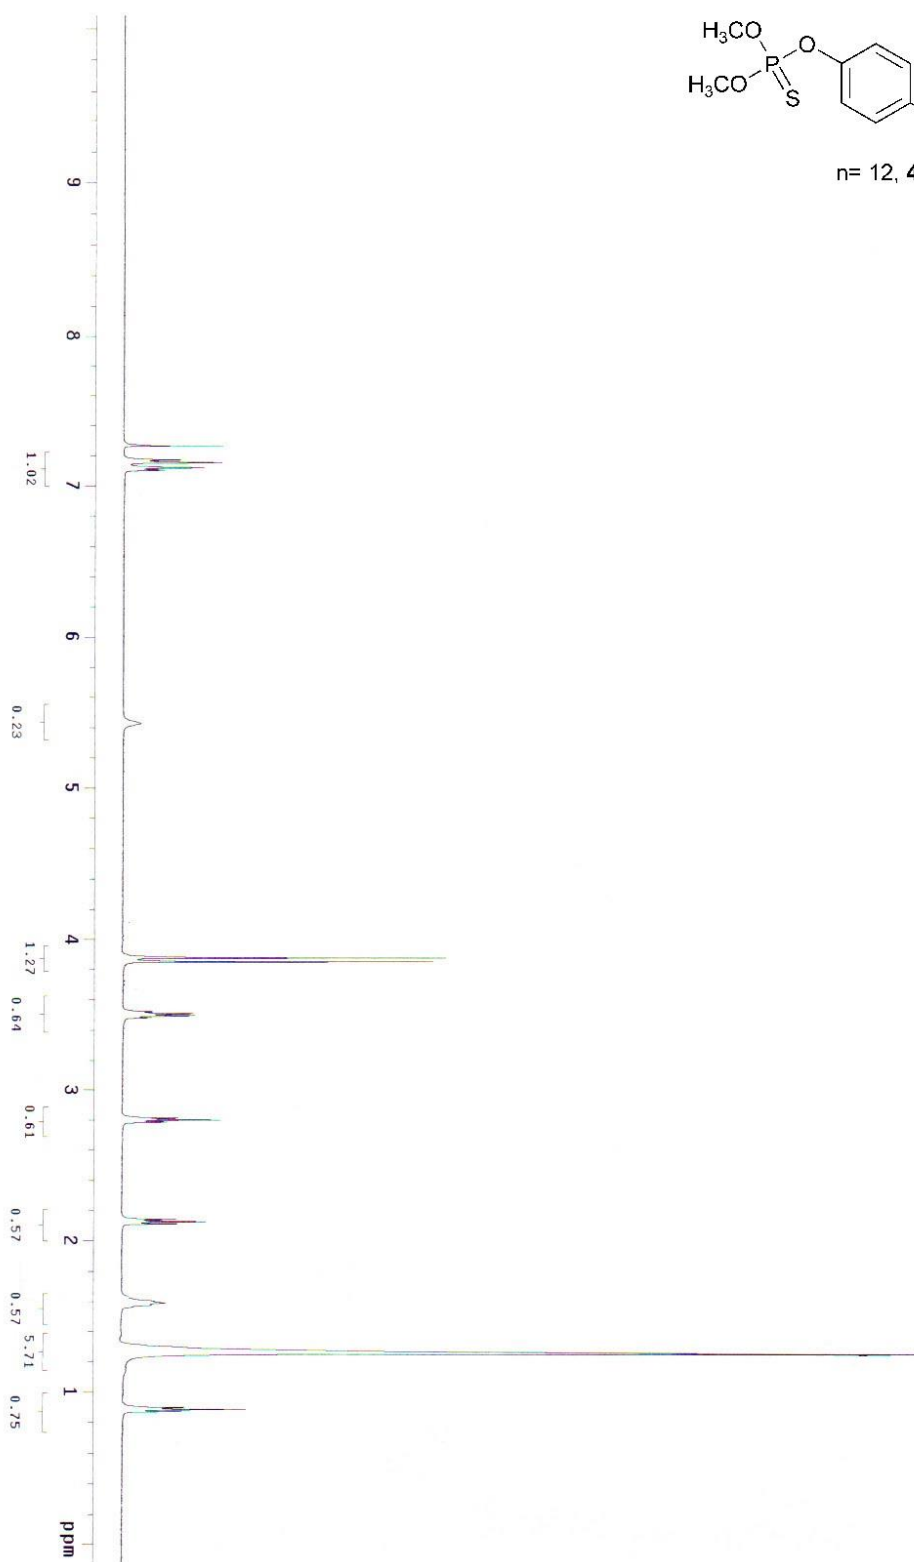

# <sup>13</sup>C NMR

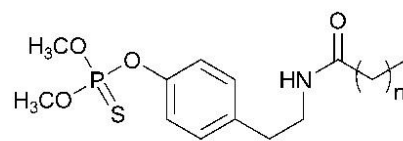

n = 12, 4c'

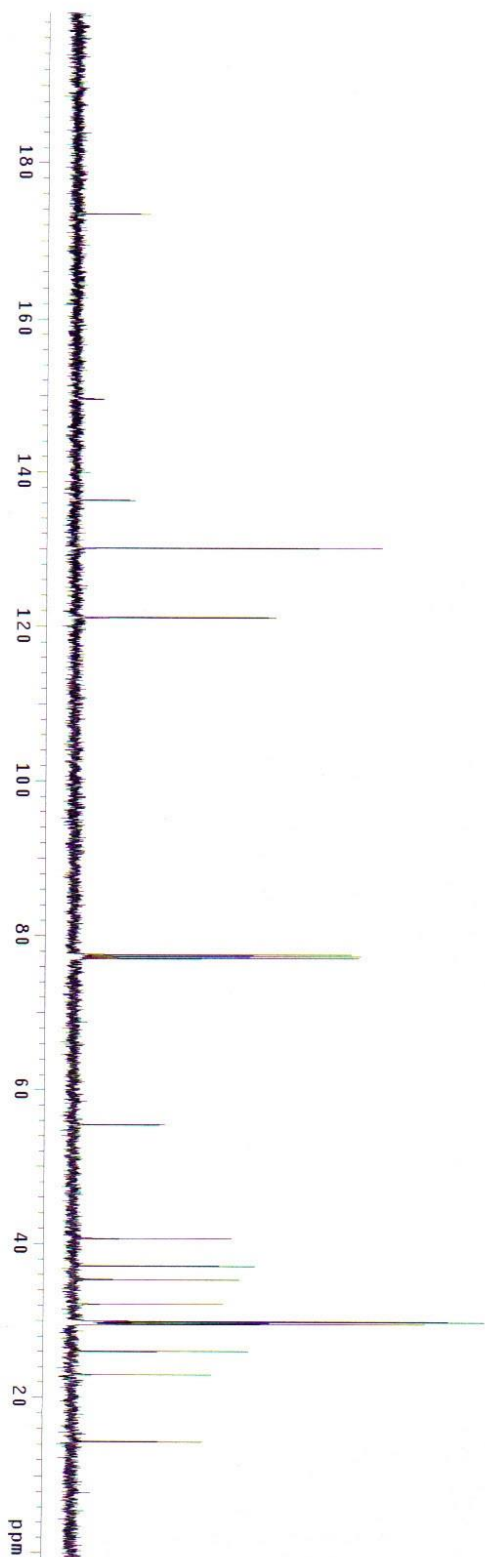



### <sup>31</sup>P NMR

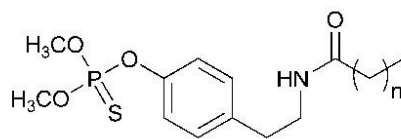

n = 12, 4c'

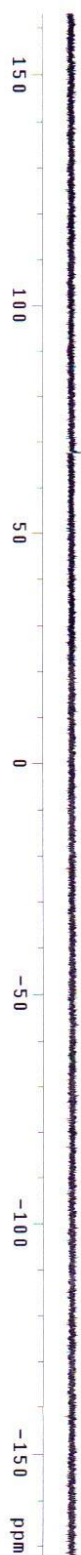

| INDEX | FREQUENCY | PPM    | HEIGHT |
|-------|-----------|--------|--------|
| 1     | 13700.355 | 67.714 | 25.8   |

# <sup>1</sup>H NMR

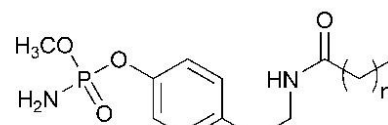

n = 10, 4d

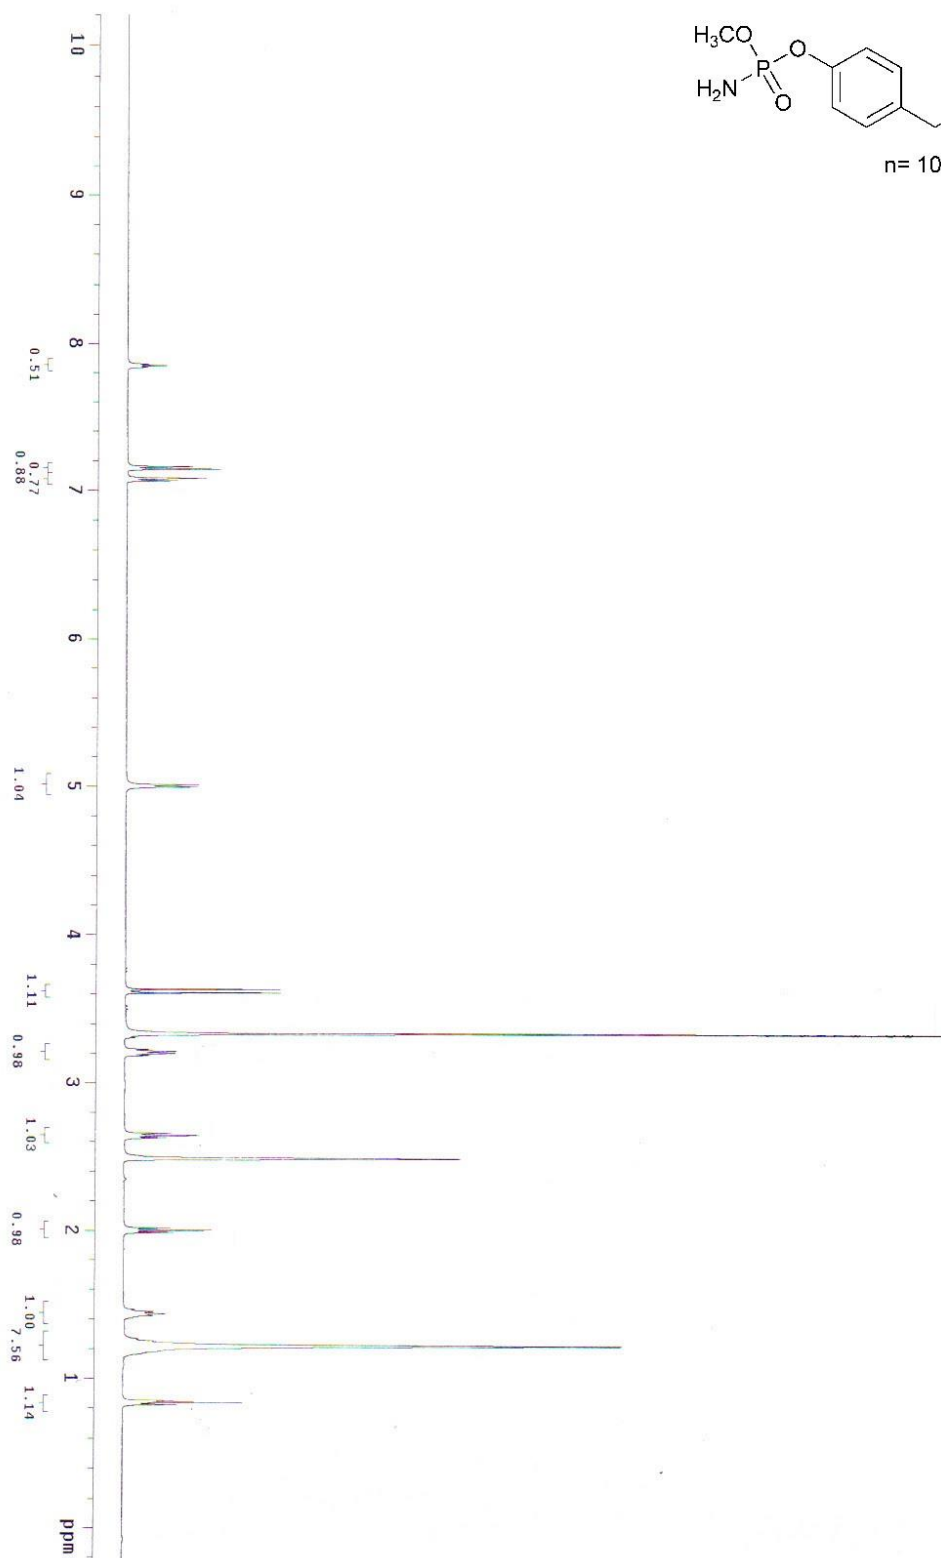

# <sup>13</sup>C NMR

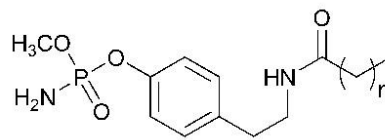

n = 10, 4d

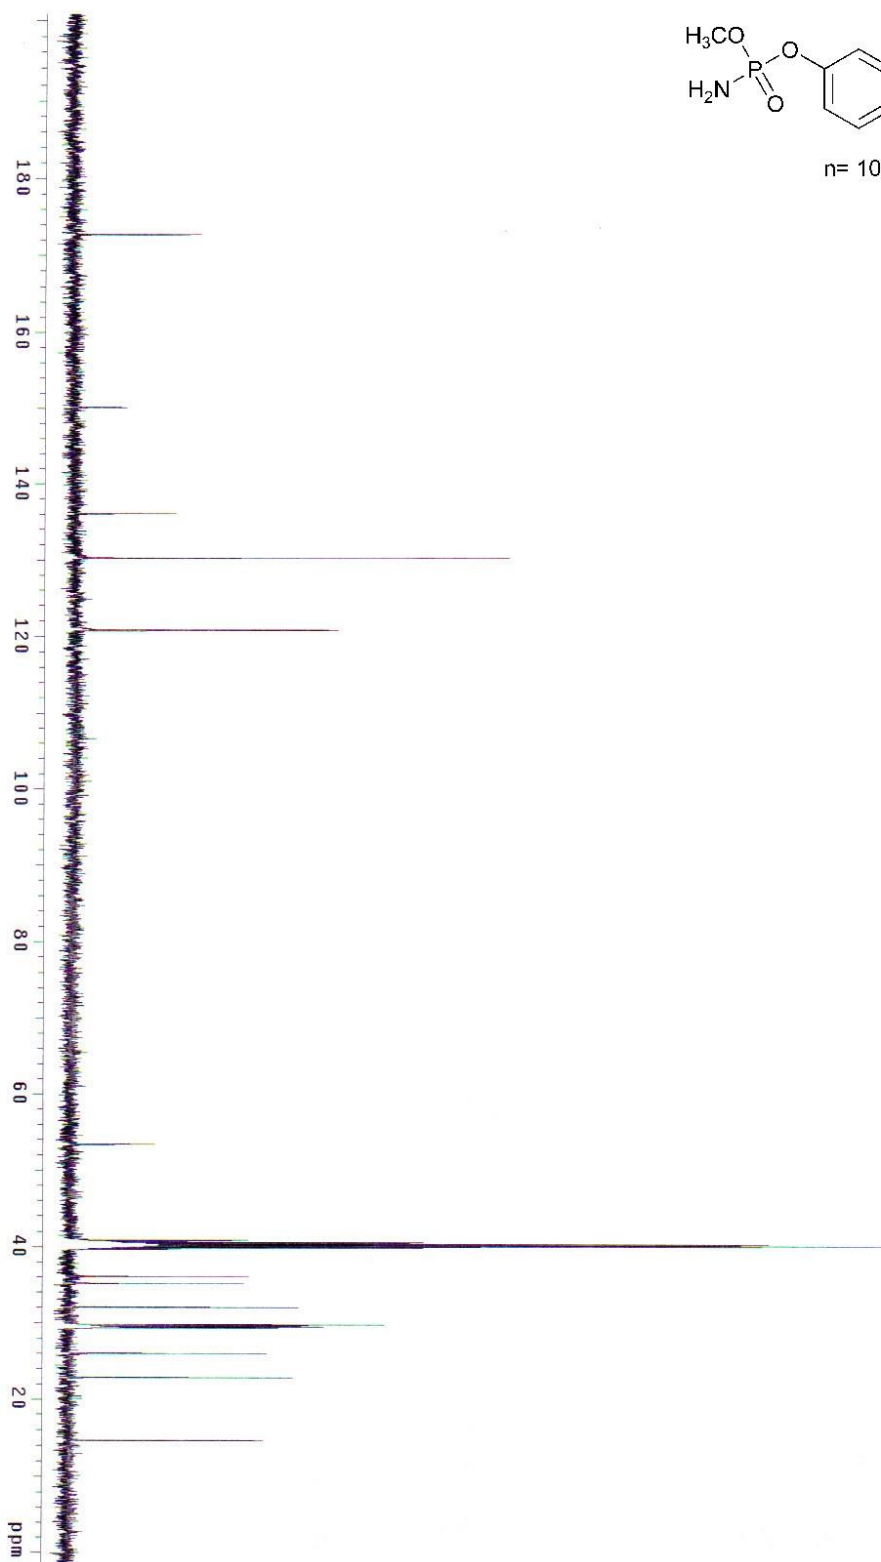

### <sup>31</sup>P NMR

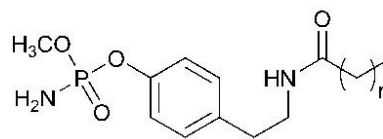

n = 10, 4d

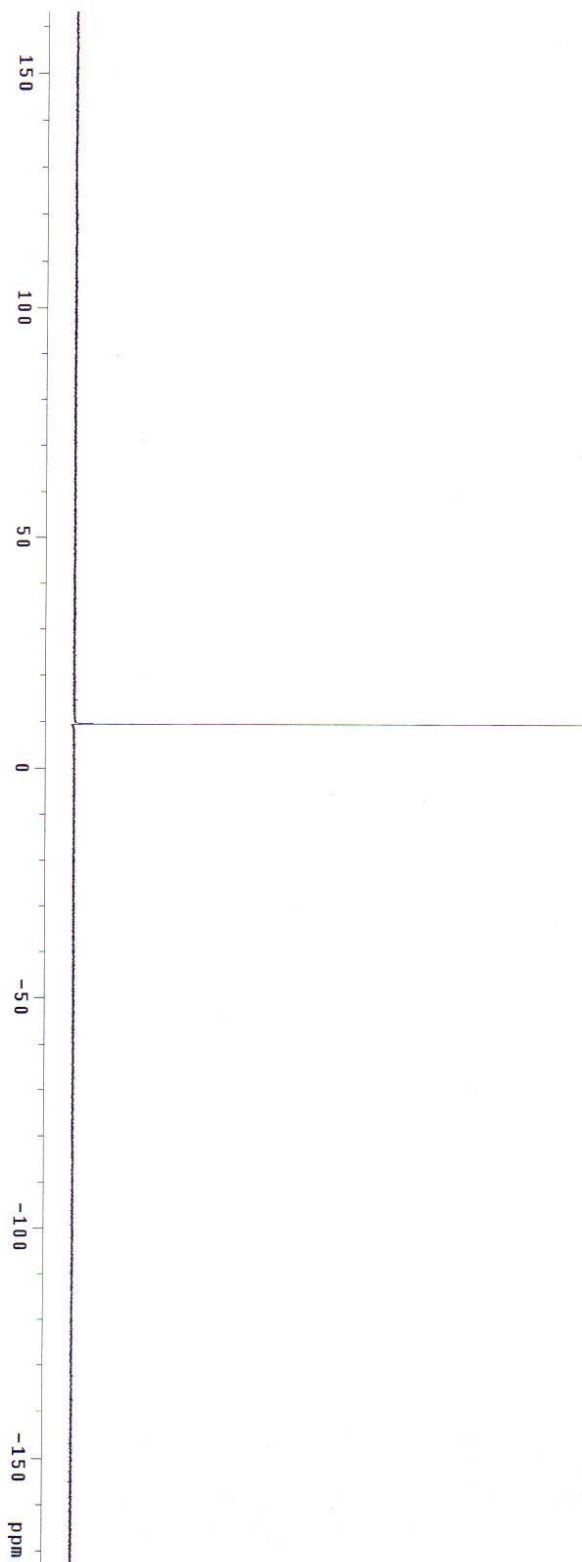

| INDEX | FREQUENCY | PPM   | HEIGHT |
|-------|-----------|-------|--------|
| 1     | 1903.110  | 9.406 | 30.5   |

# <sup>1</sup>H NMR

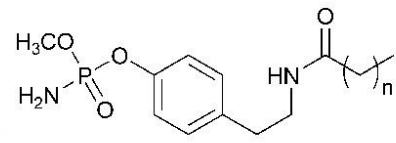

n = 11, 4e

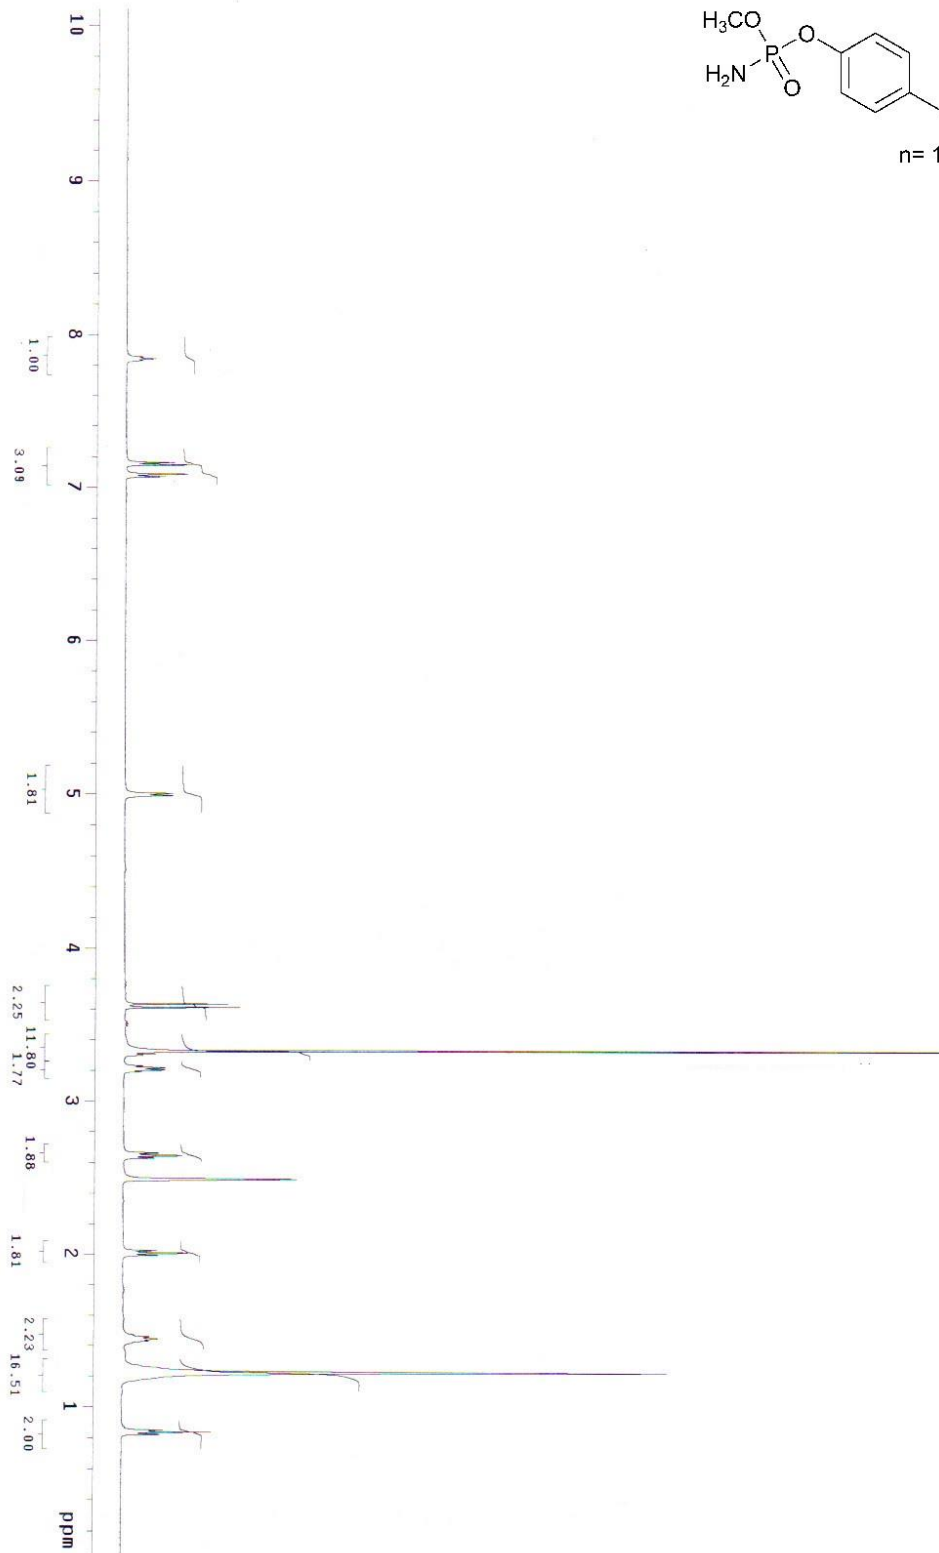

**<sup>13</sup>C NMR**

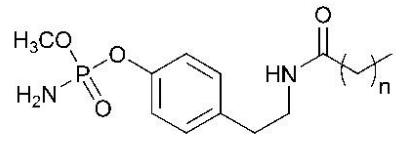

n = 11, **4e**

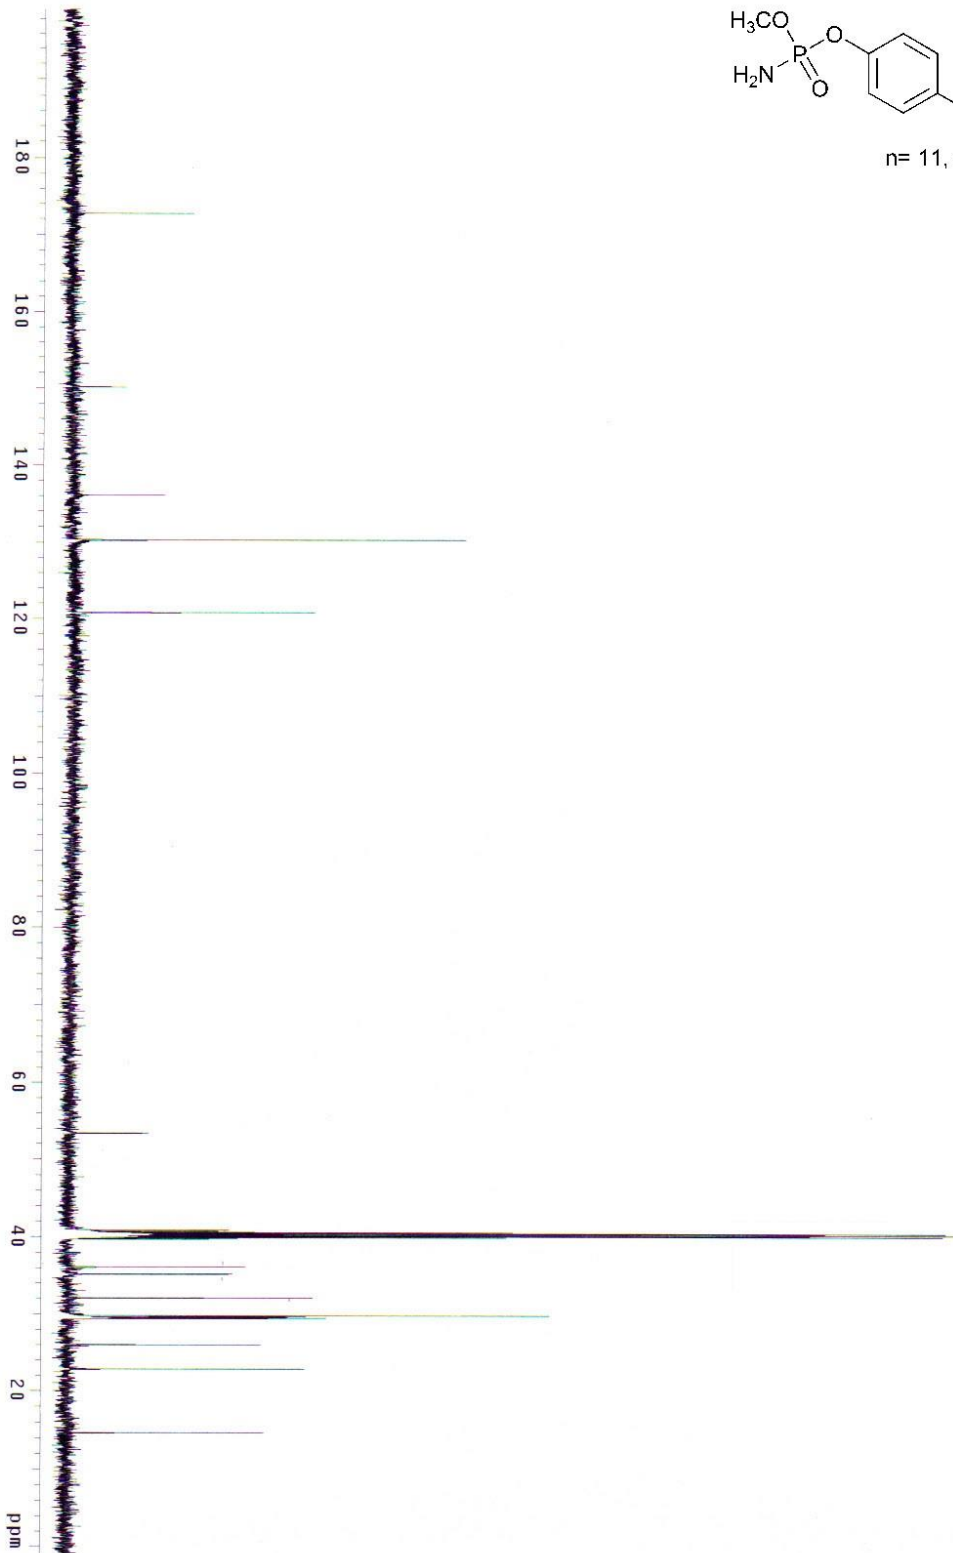

### <sup>31</sup>P NMR

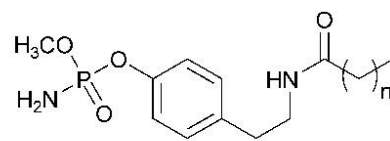

n = 11, **4e**

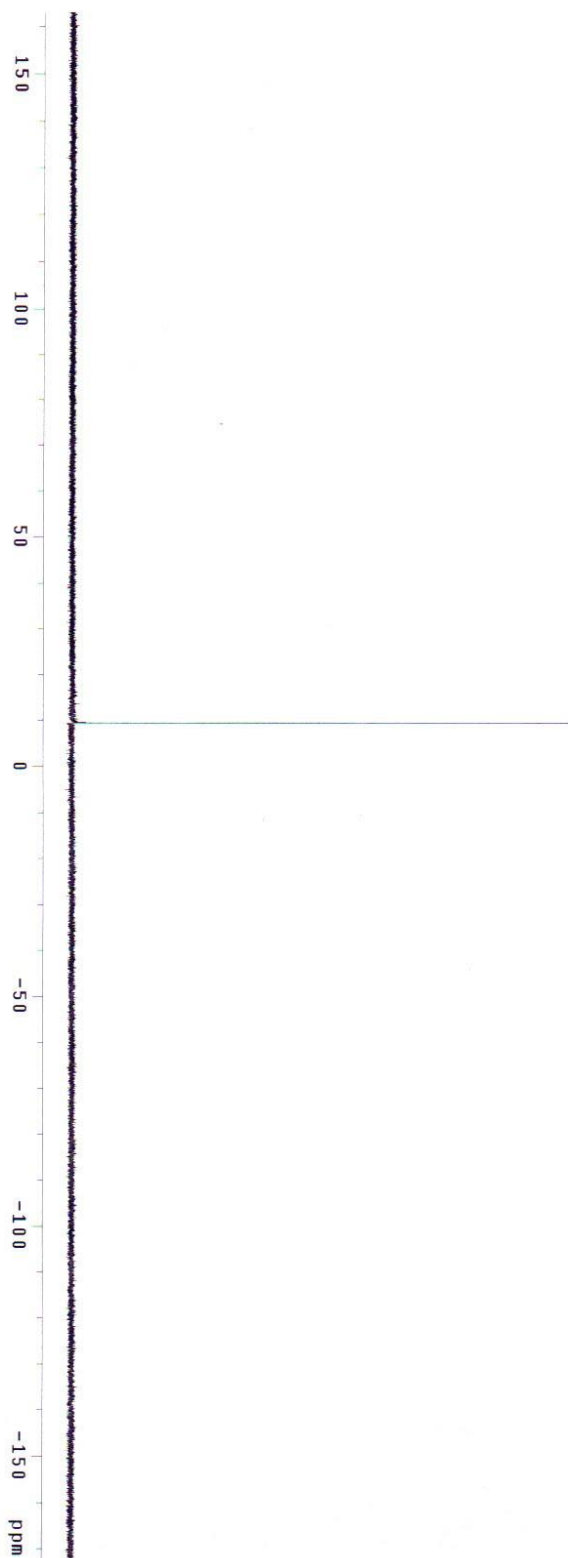

| INDEX | FREQUENCY | PPM   | HEIGHT |
|-------|-----------|-------|--------|
| 1     | 1302.072  | 9.401 | 28.9   |

# <sup>1</sup>H NMR

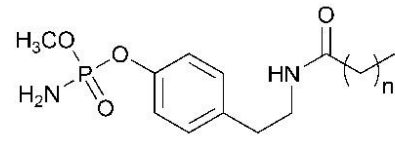

n = 12, 4f

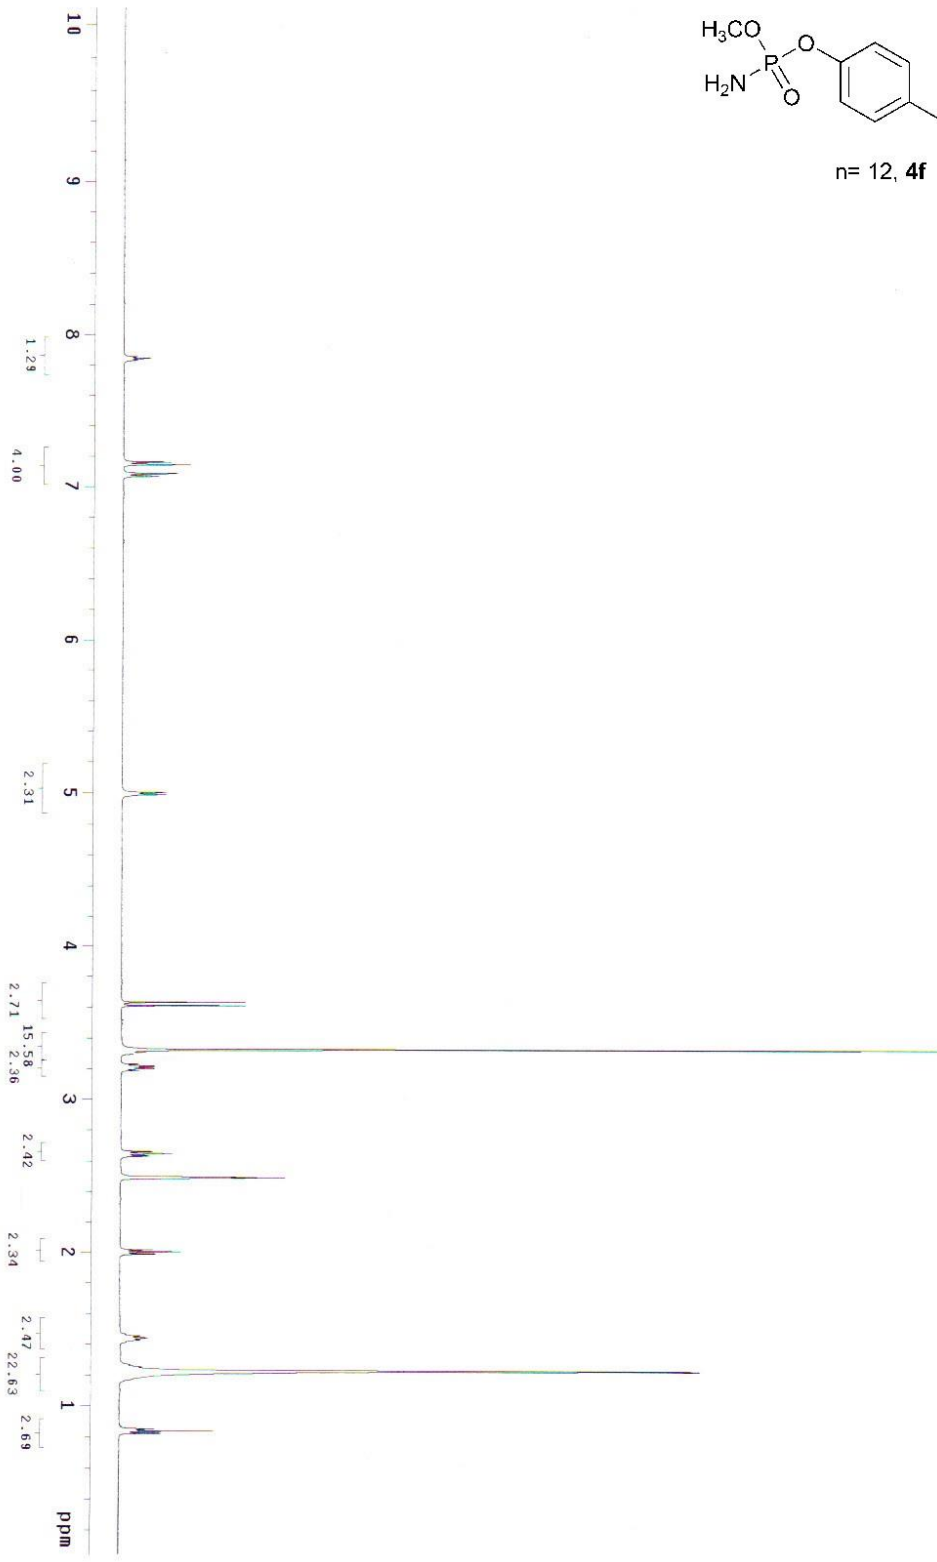



**<sup>13</sup>C NMR**

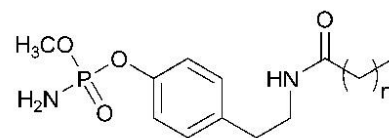

n = 12, 4f

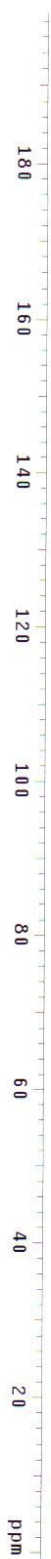

### <sup>31</sup>P NMR

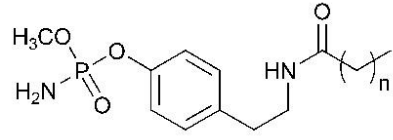

n = 12, 4f

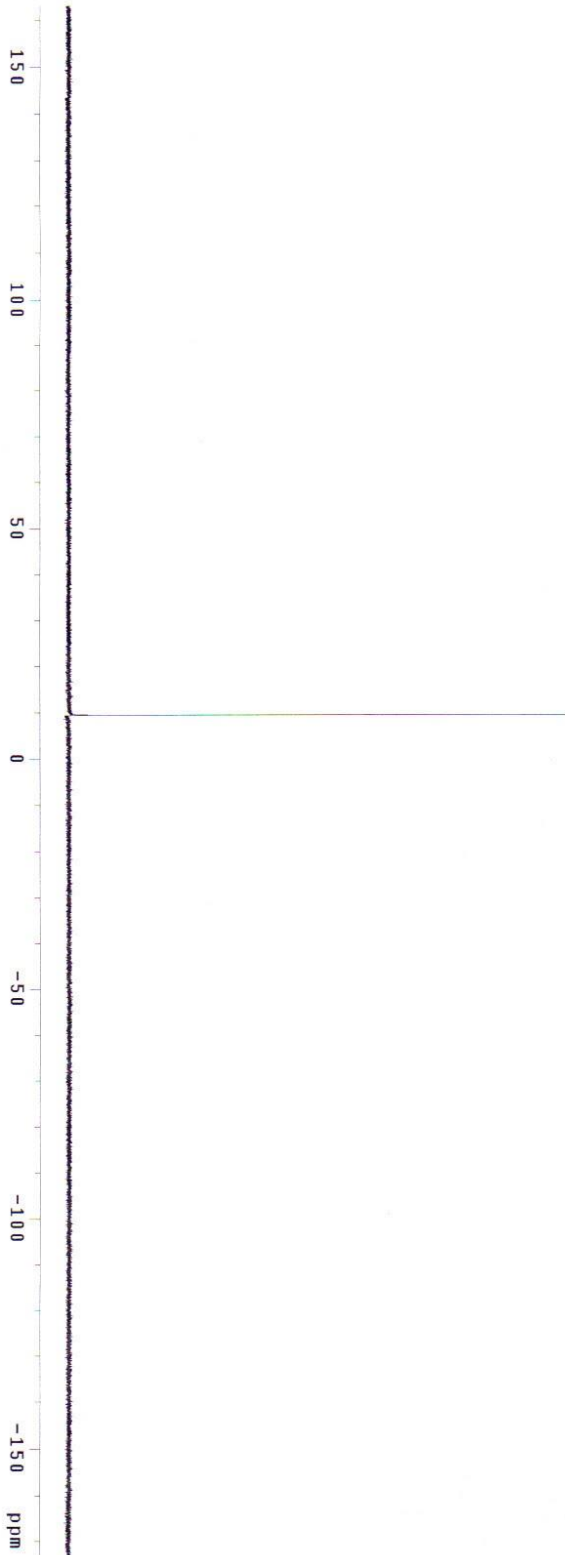

| INDEX | FREQUENCY | PPM   | HEIGHT |
|-------|-----------|-------|--------|
| 1     | 1902.072  | 9.401 | 38.7   |

# <sup>1</sup>H NMR

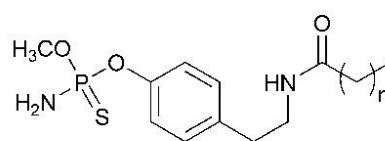

n = 10, 4d'

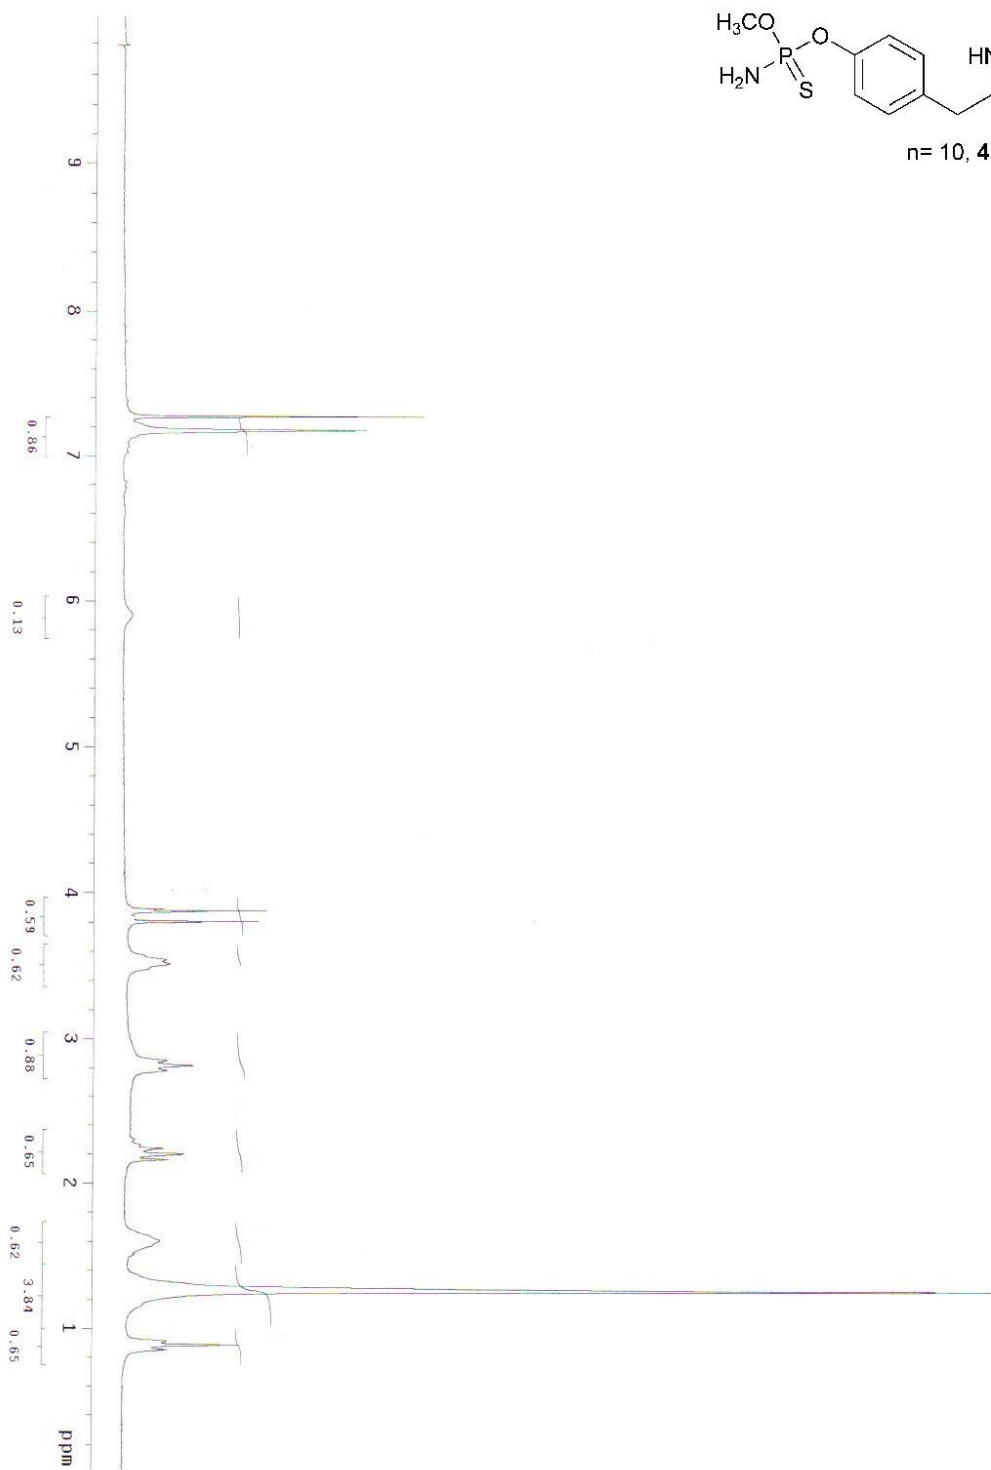

# <sup>13</sup>C NMR

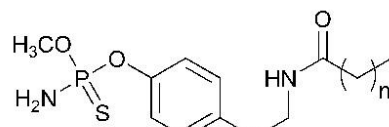

n = 10, 4d'

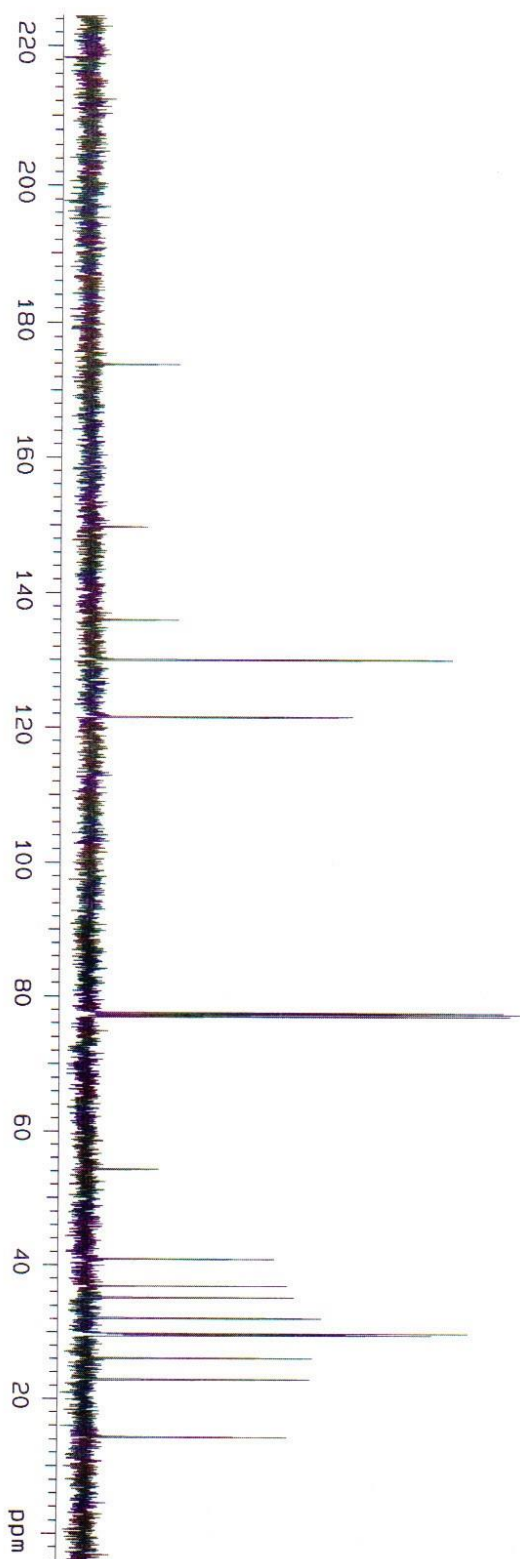

### <sup>31</sup>P NMR

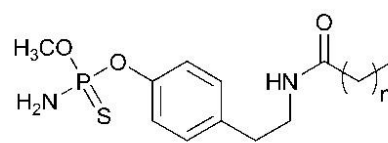

n = 10, **4d'**

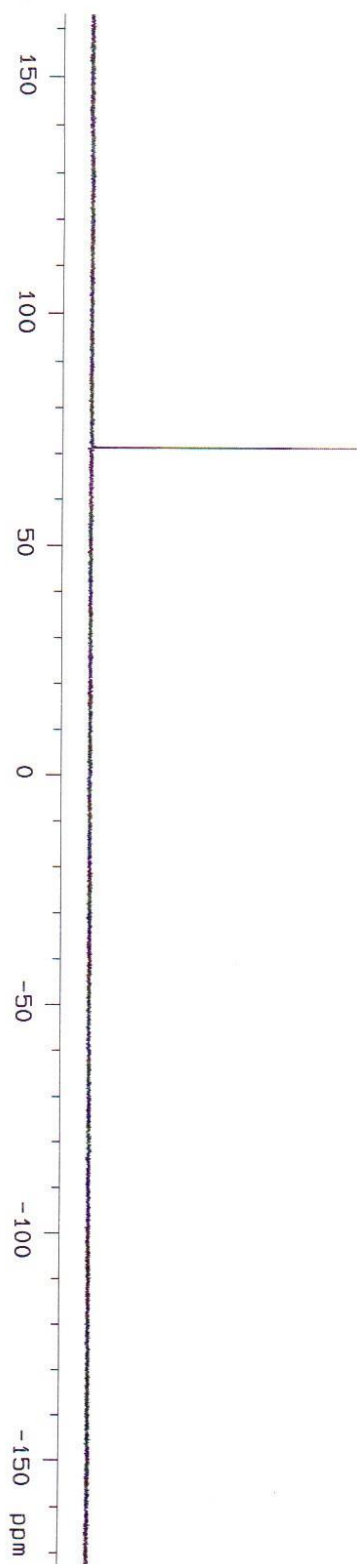

| INDEX | FREQUENCY | PPM    | HEIGHT |
|-------|-----------|--------|--------|
| 1     | 14421.785 | 71.280 | 14.4   |

# <sup>1</sup>H NMR

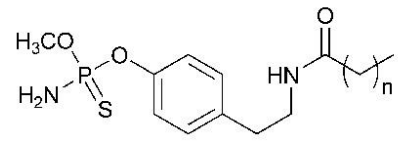

n = 11, 4e'

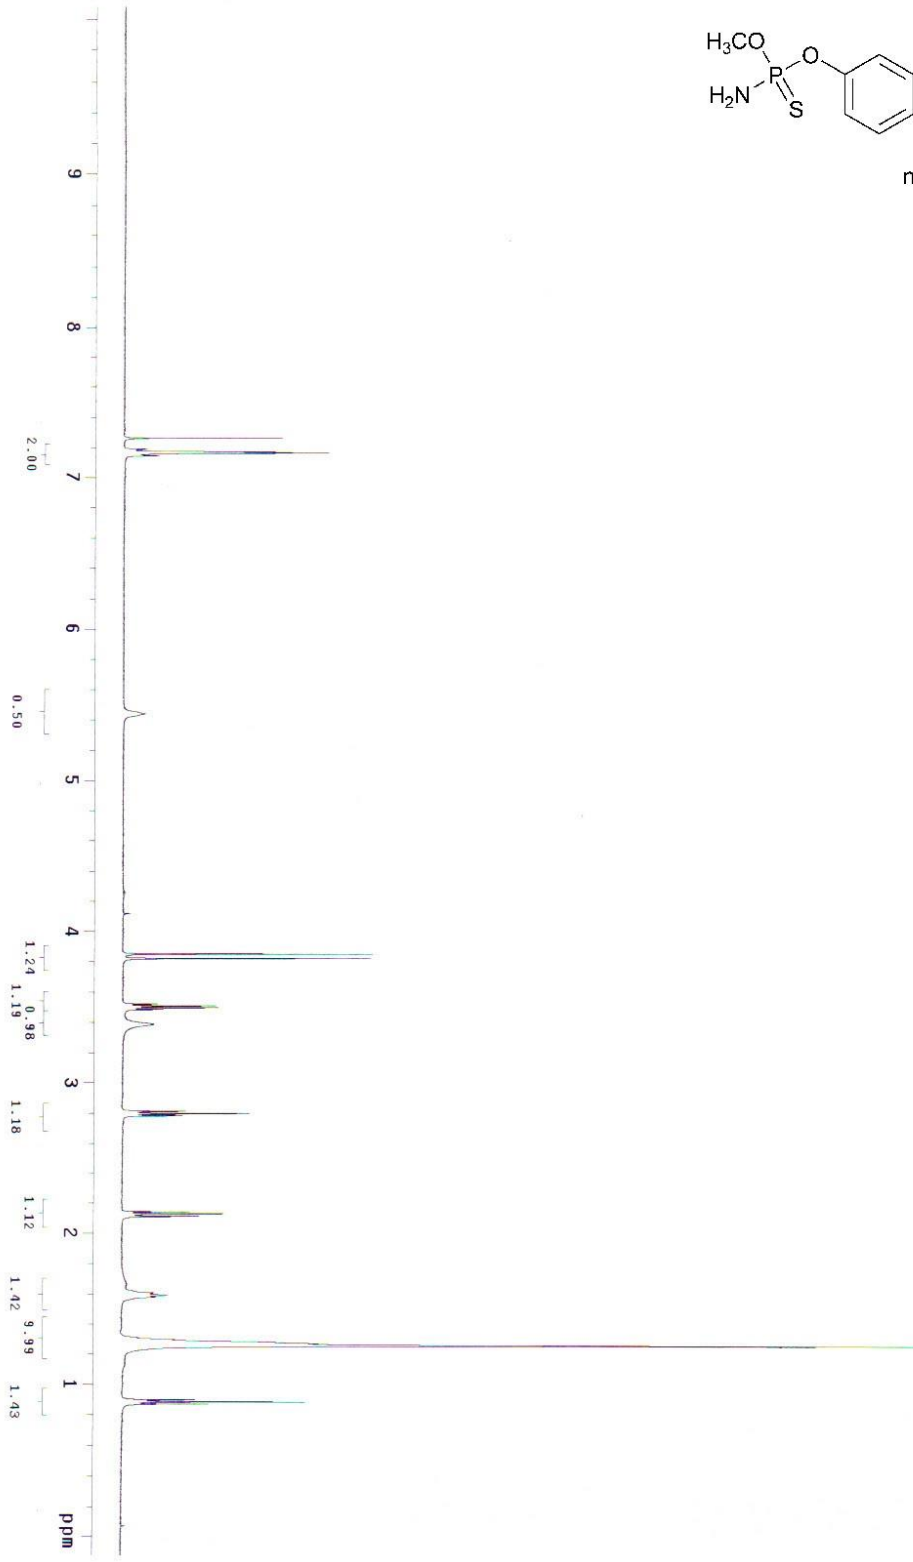

**<sup>13</sup>C NMR**

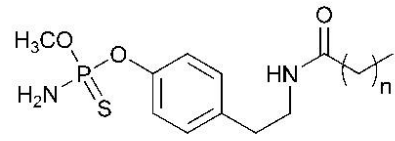

n = 11, 4e'

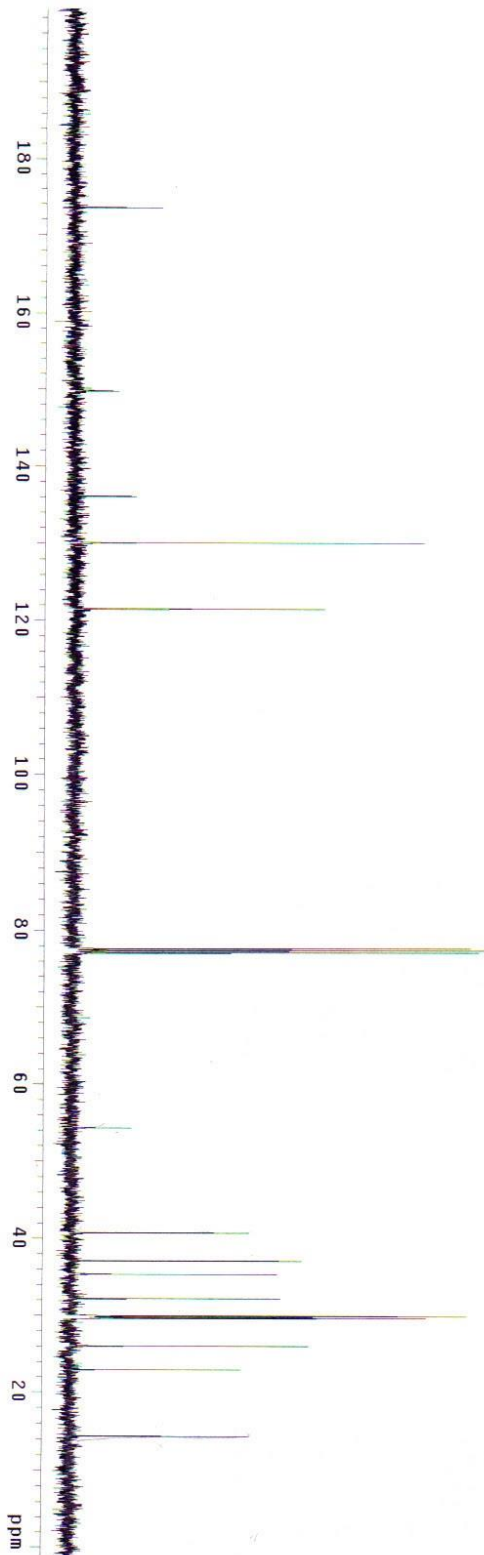

### <sup>31</sup>P NMR

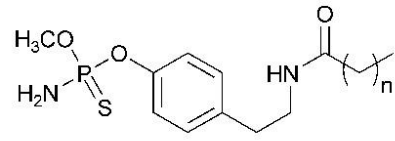

n = 11, **4e'**

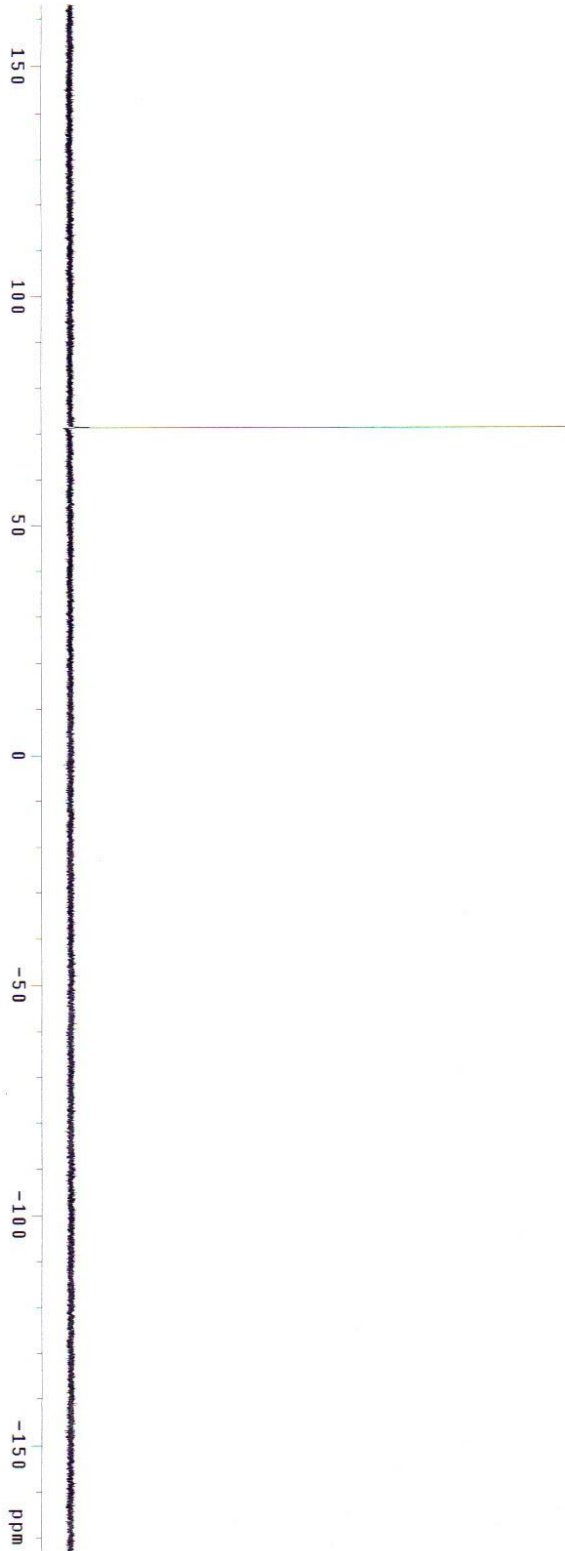

| INDEX | FREQUENCY | PPM    | HEIGHT |
|-------|-----------|--------|--------|
| 1     | 14414.519 | 71.244 | 27.0   |



# <sup>1</sup>H NMR

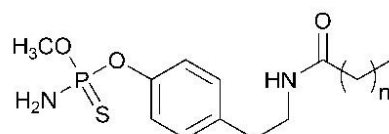

n = 12, **4f**

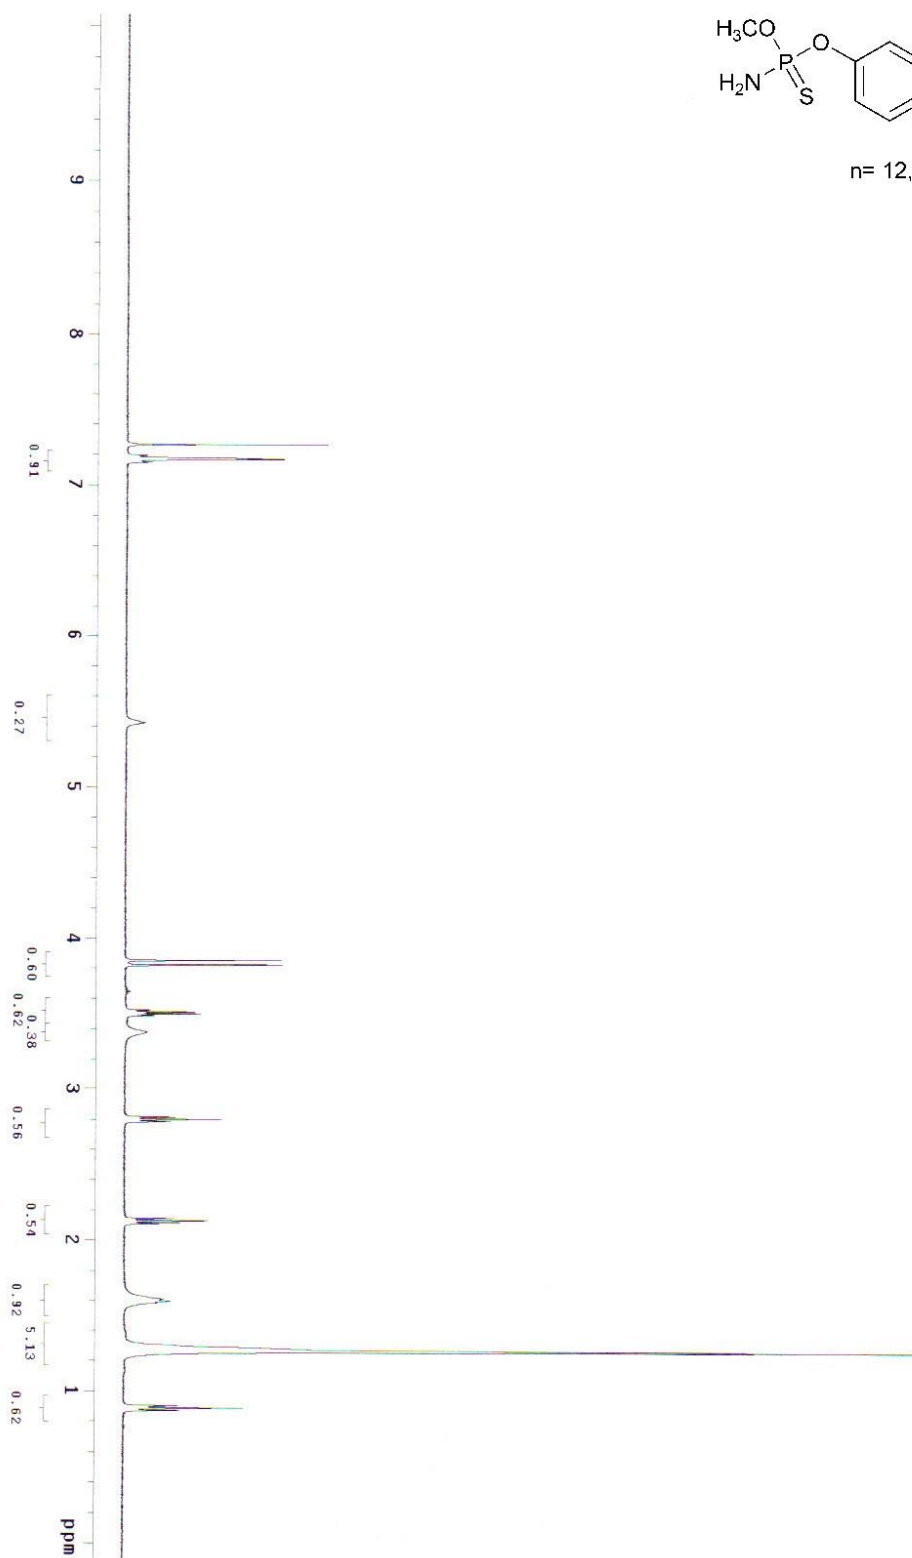

# <sup>13</sup>C NMR

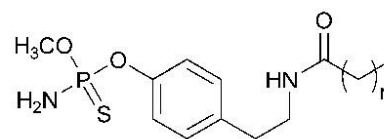

n = 12, 4f'

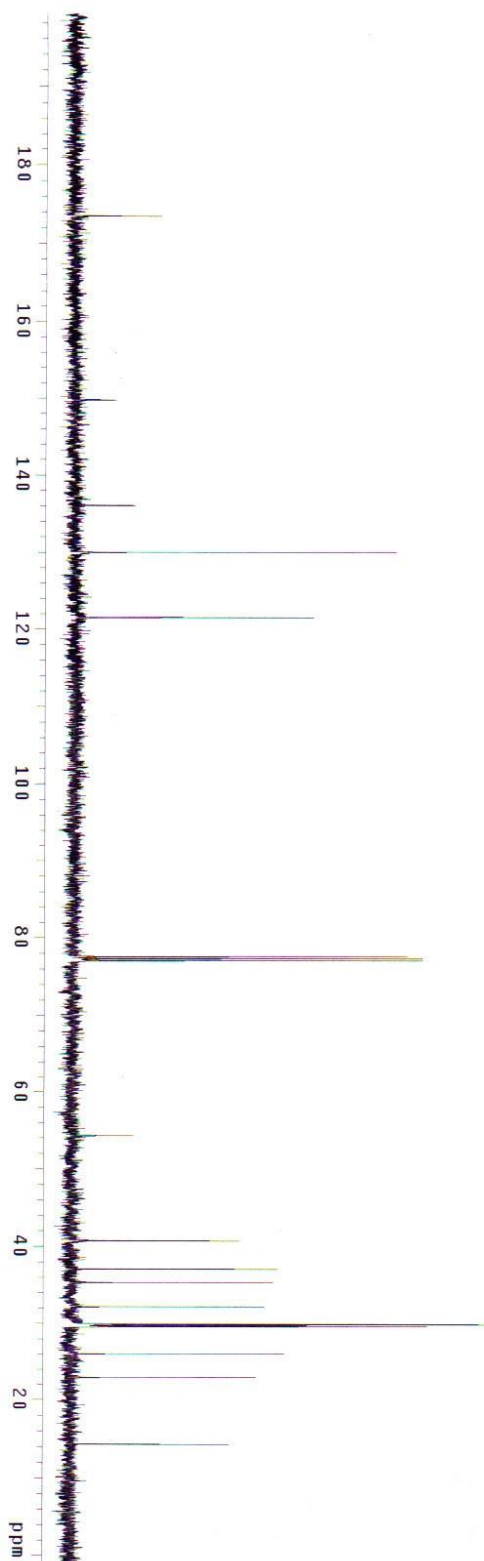

### <sup>31</sup>P NMR

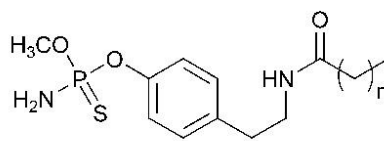

n = 12, 4f'

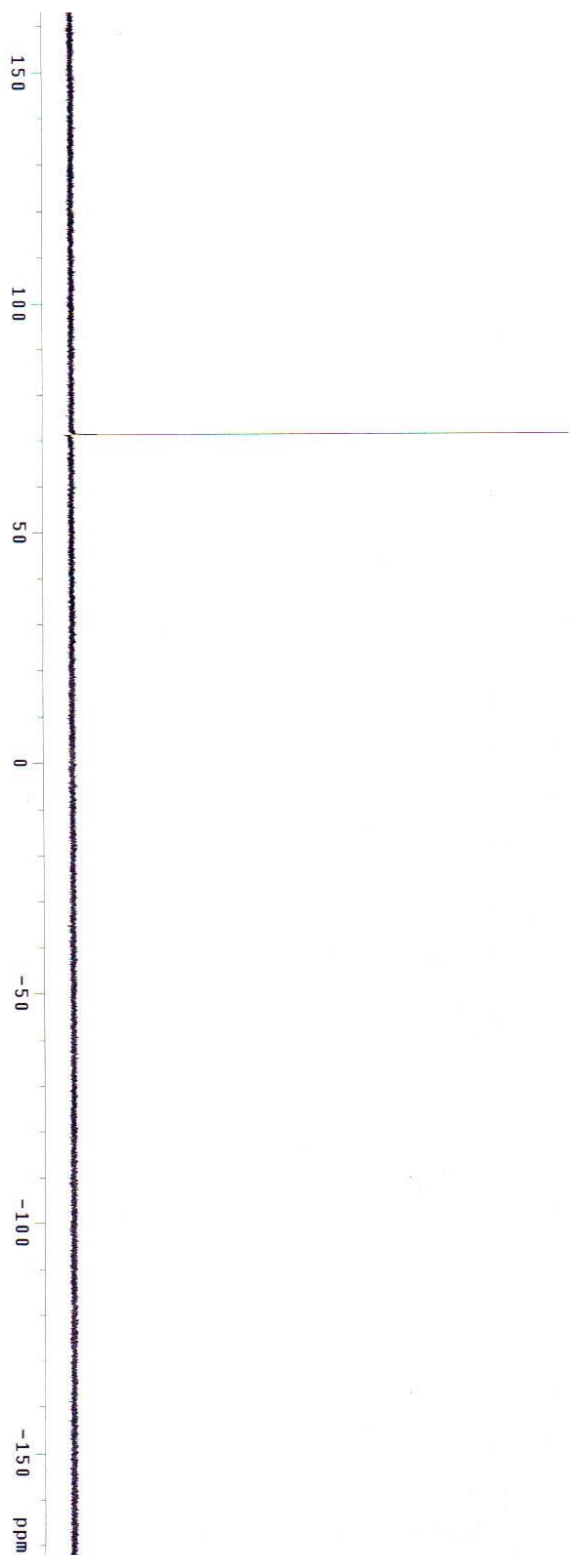

| INDEX | FREQUENCY | PPM    | HEIGHT |
|-------|-----------|--------|--------|
| 1     | 14416.595 | 71.254 | 29.2   |

# <sup>1</sup>H NMR

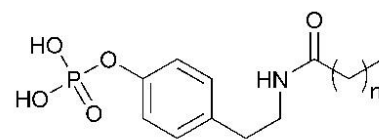

n = 10, 5a

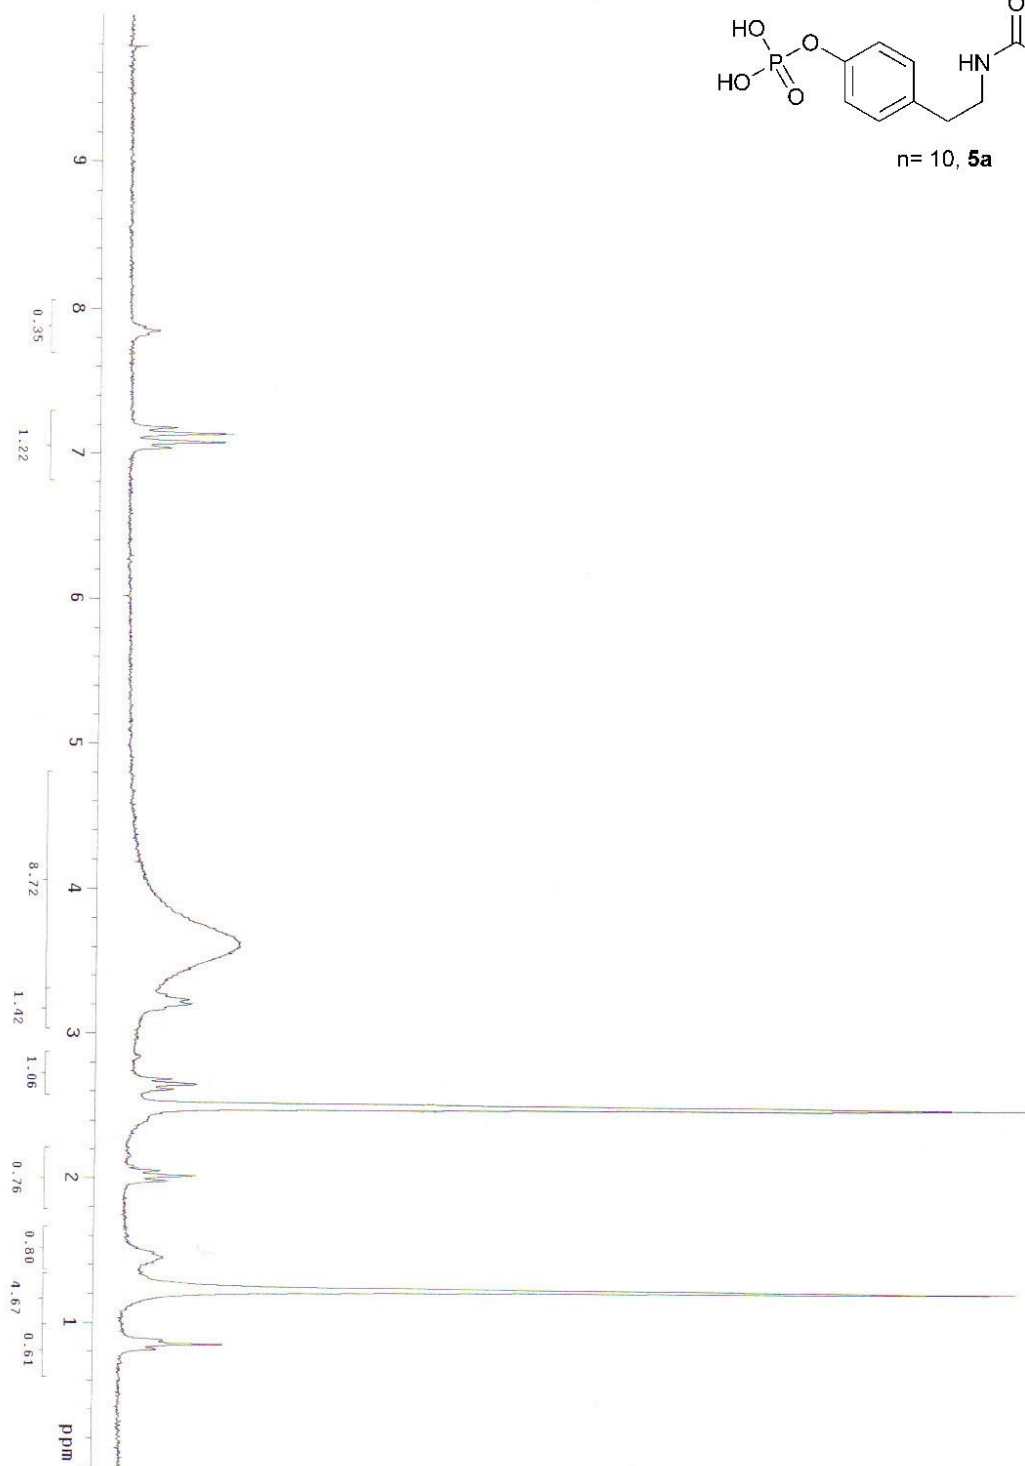

**<sup>13</sup>C NMR**

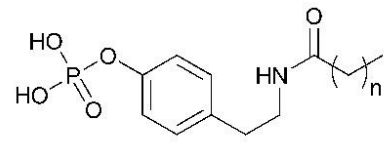

n = 10, **5a**

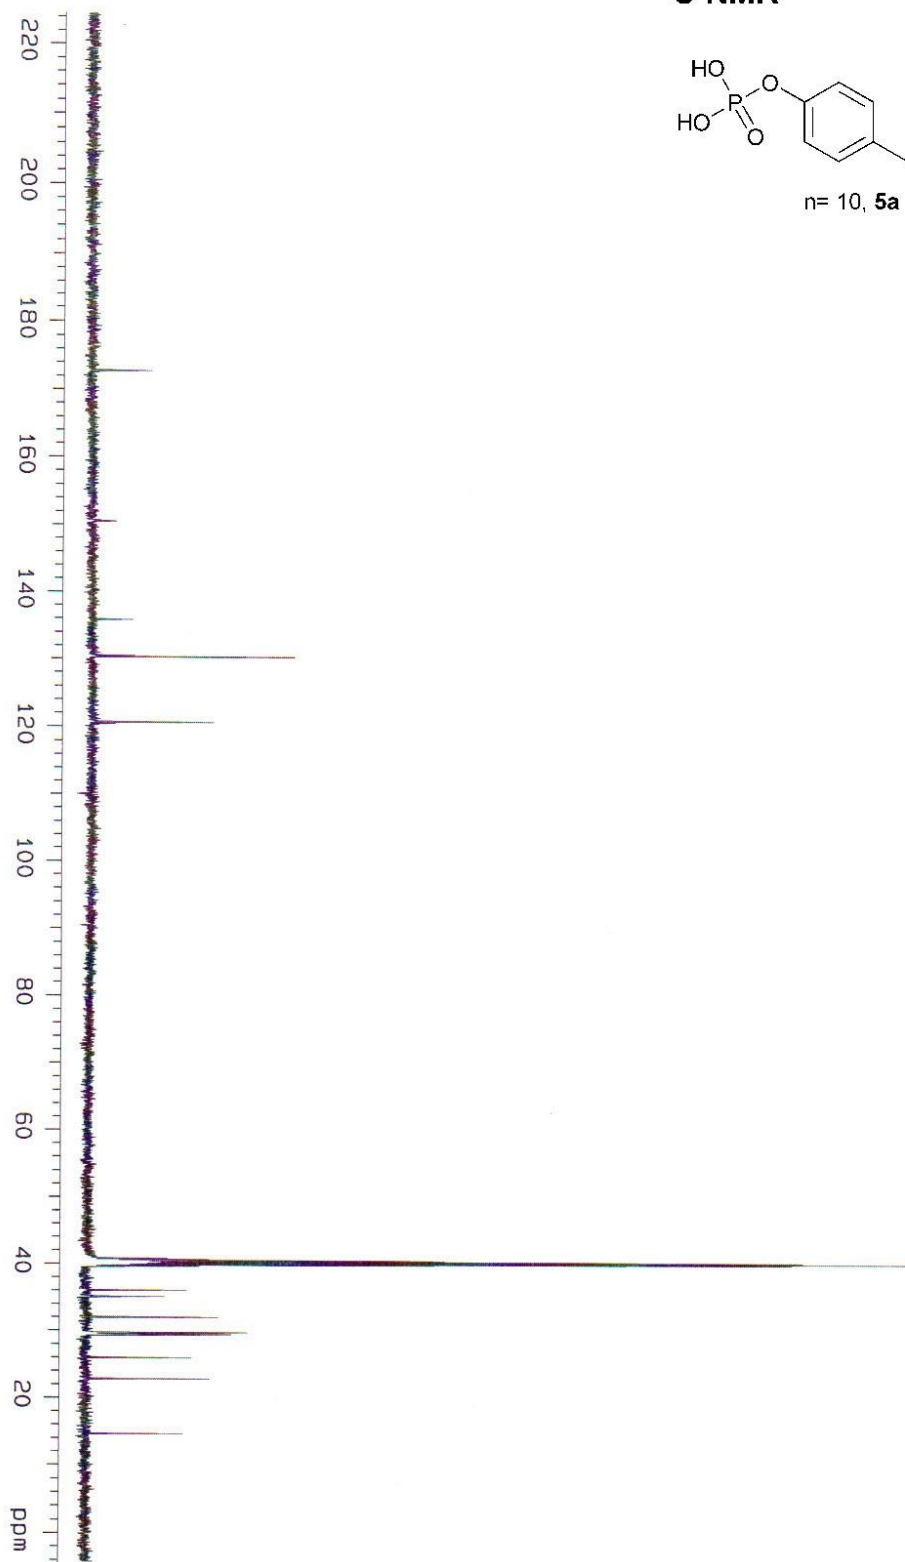

### <sup>31</sup>P NMR

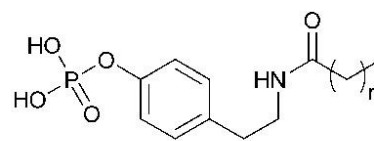

n = 10, 5a

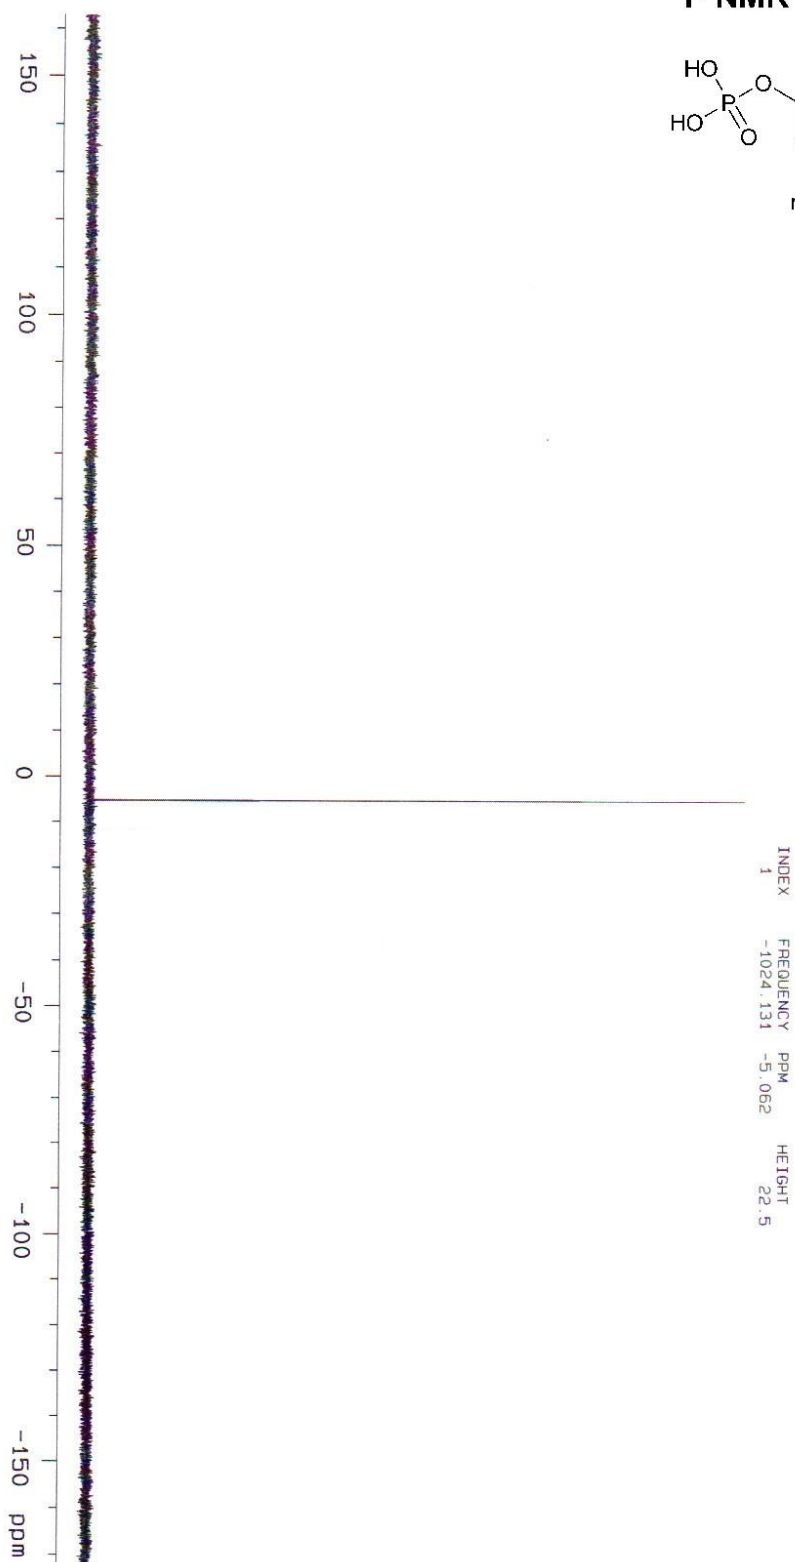

# <sup>1</sup>H NMR

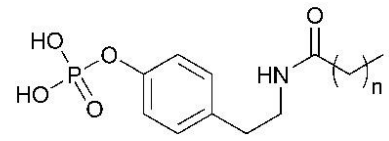

n = 11, **5b**

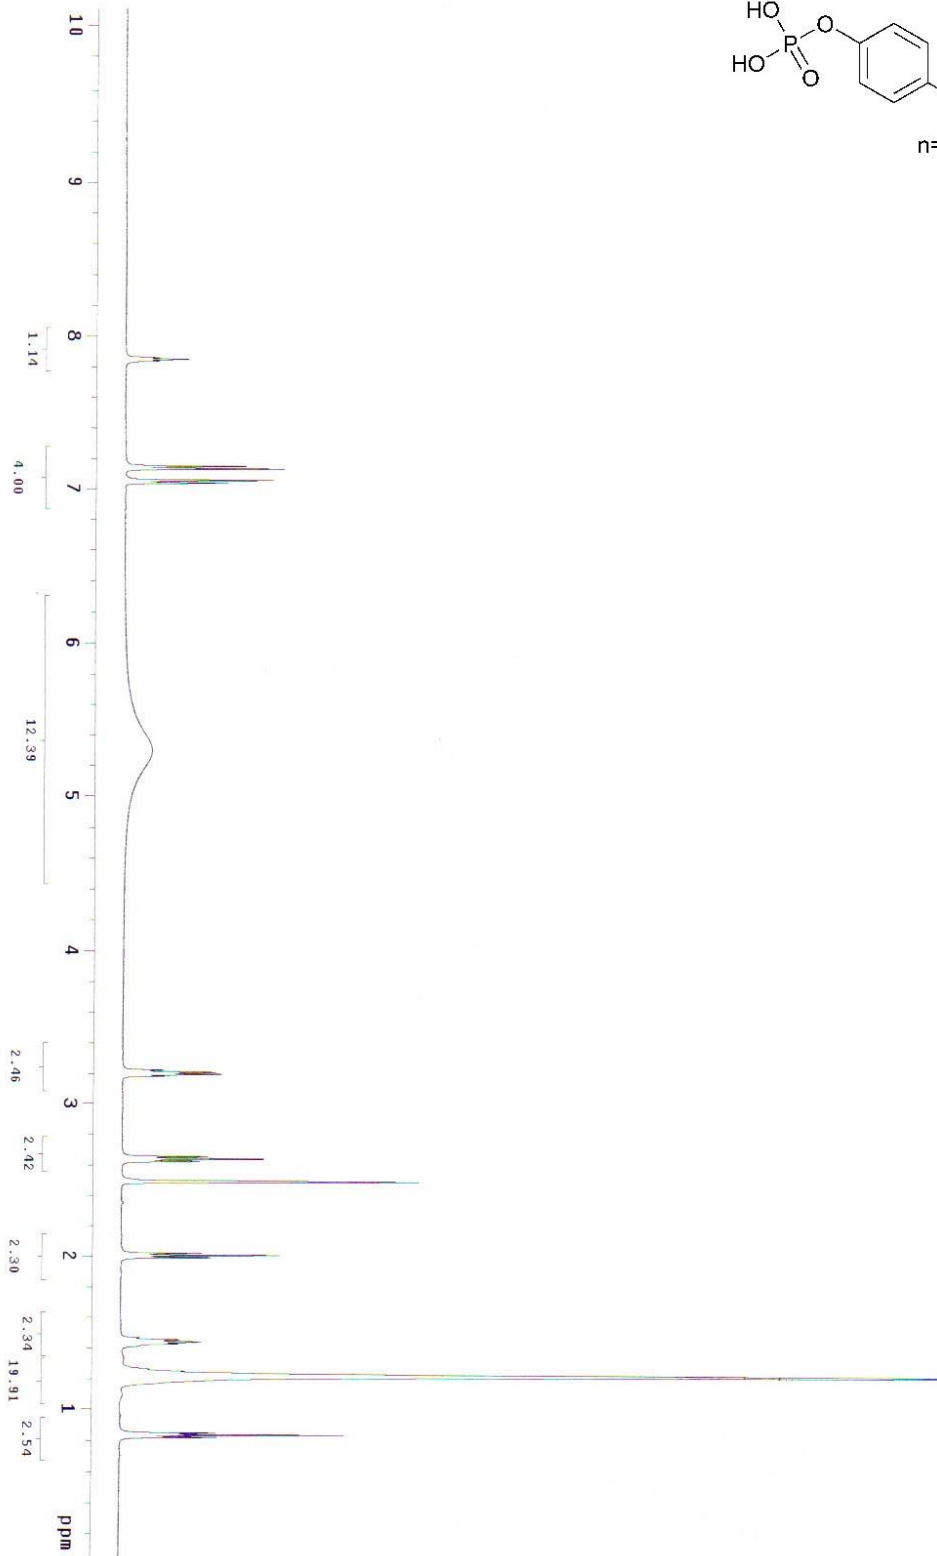

**<sup>13</sup>C NMR**

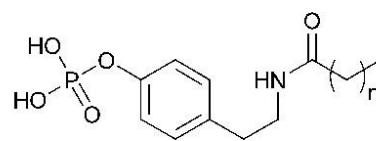

n= 11, **5b**

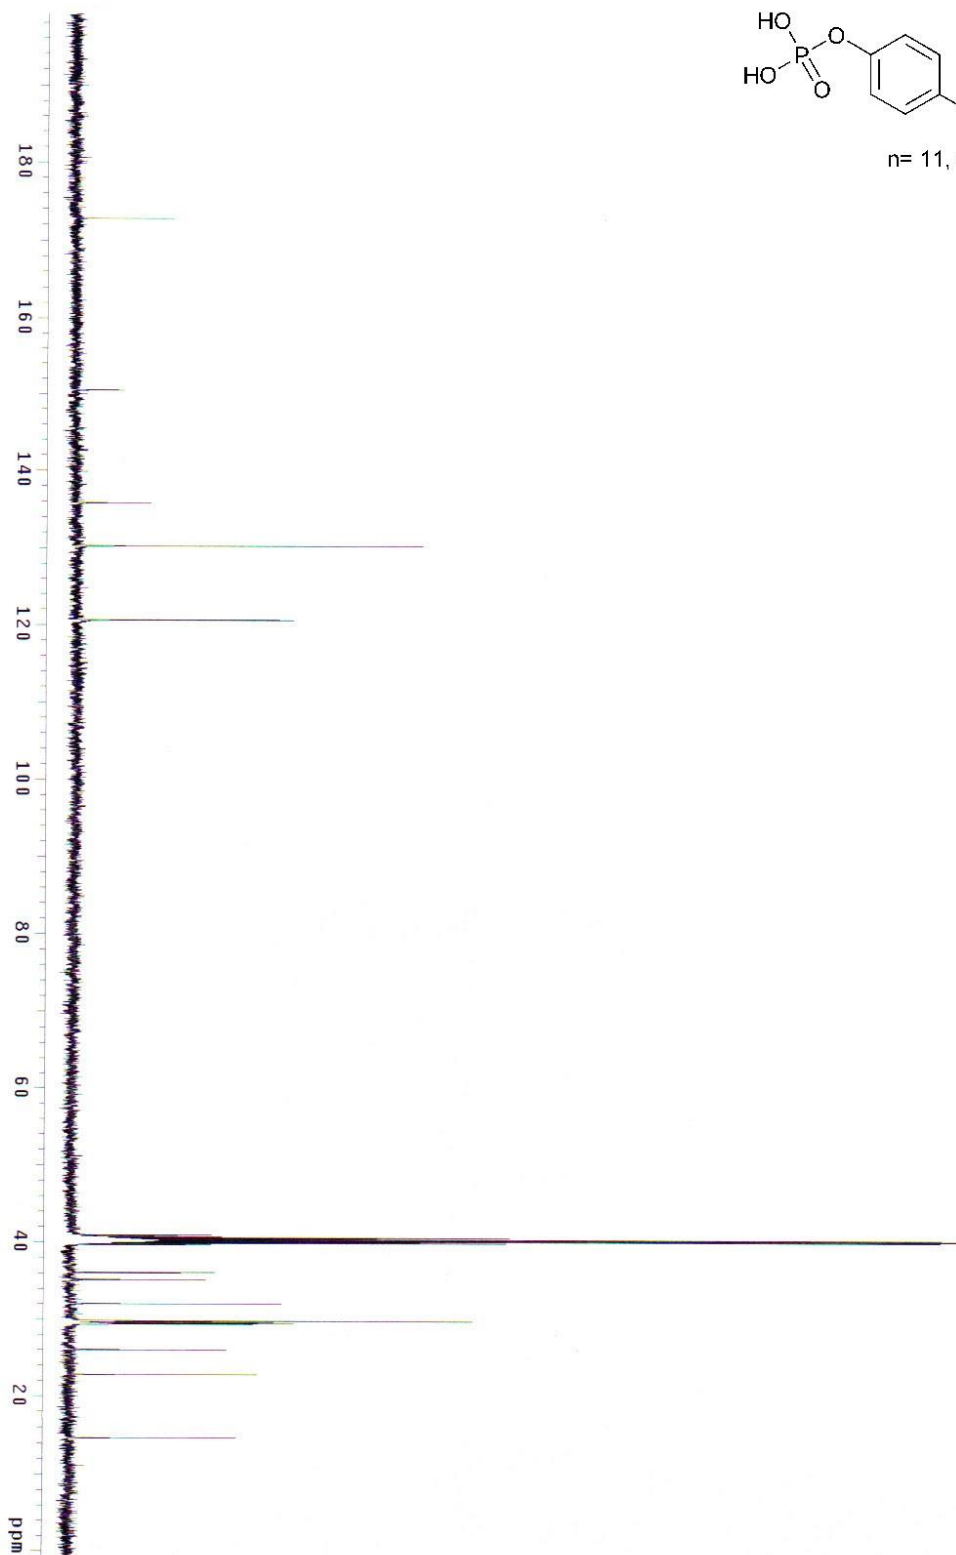



### <sup>31</sup>P NMR

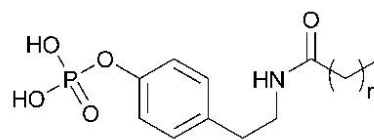

n = 11, **5b**

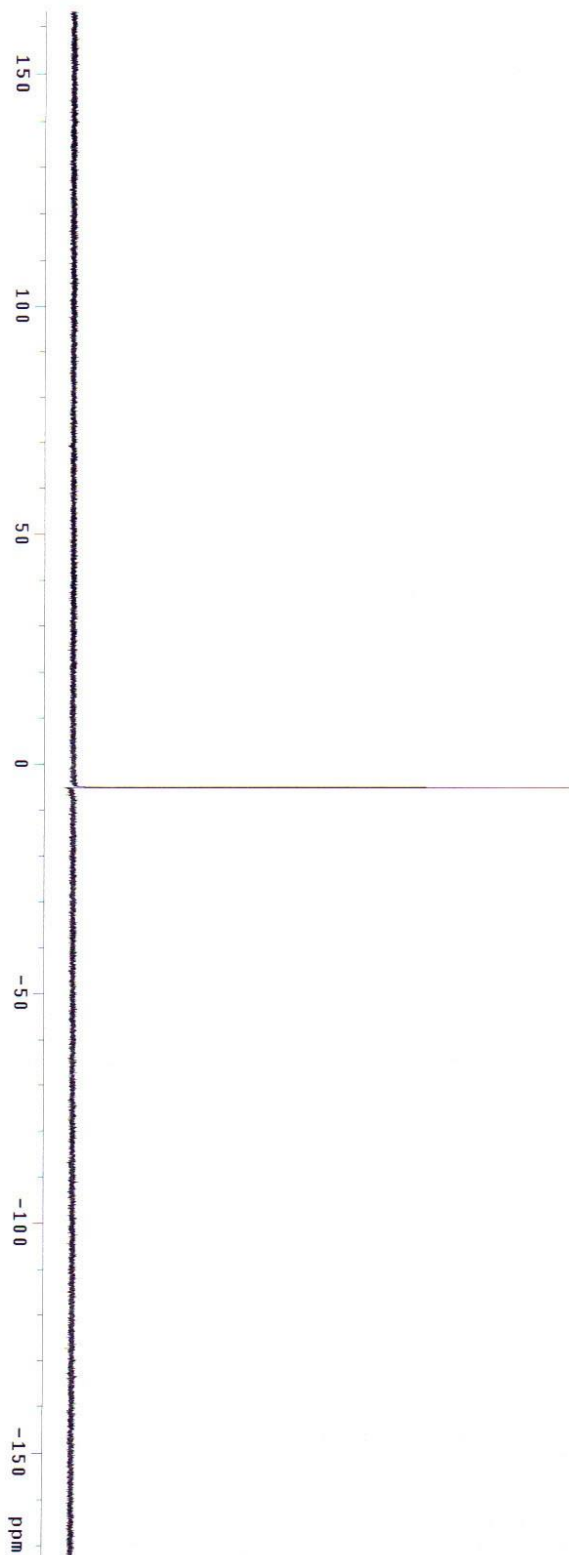

| INDEX | FREQUENCY | PPM    | HEIGHT |
|-------|-----------|--------|--------|
| 1     | -1023.093 | -5.057 | 30.0   |

# <sup>1</sup>H NMR

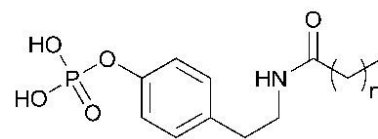

n = 12, **5c**

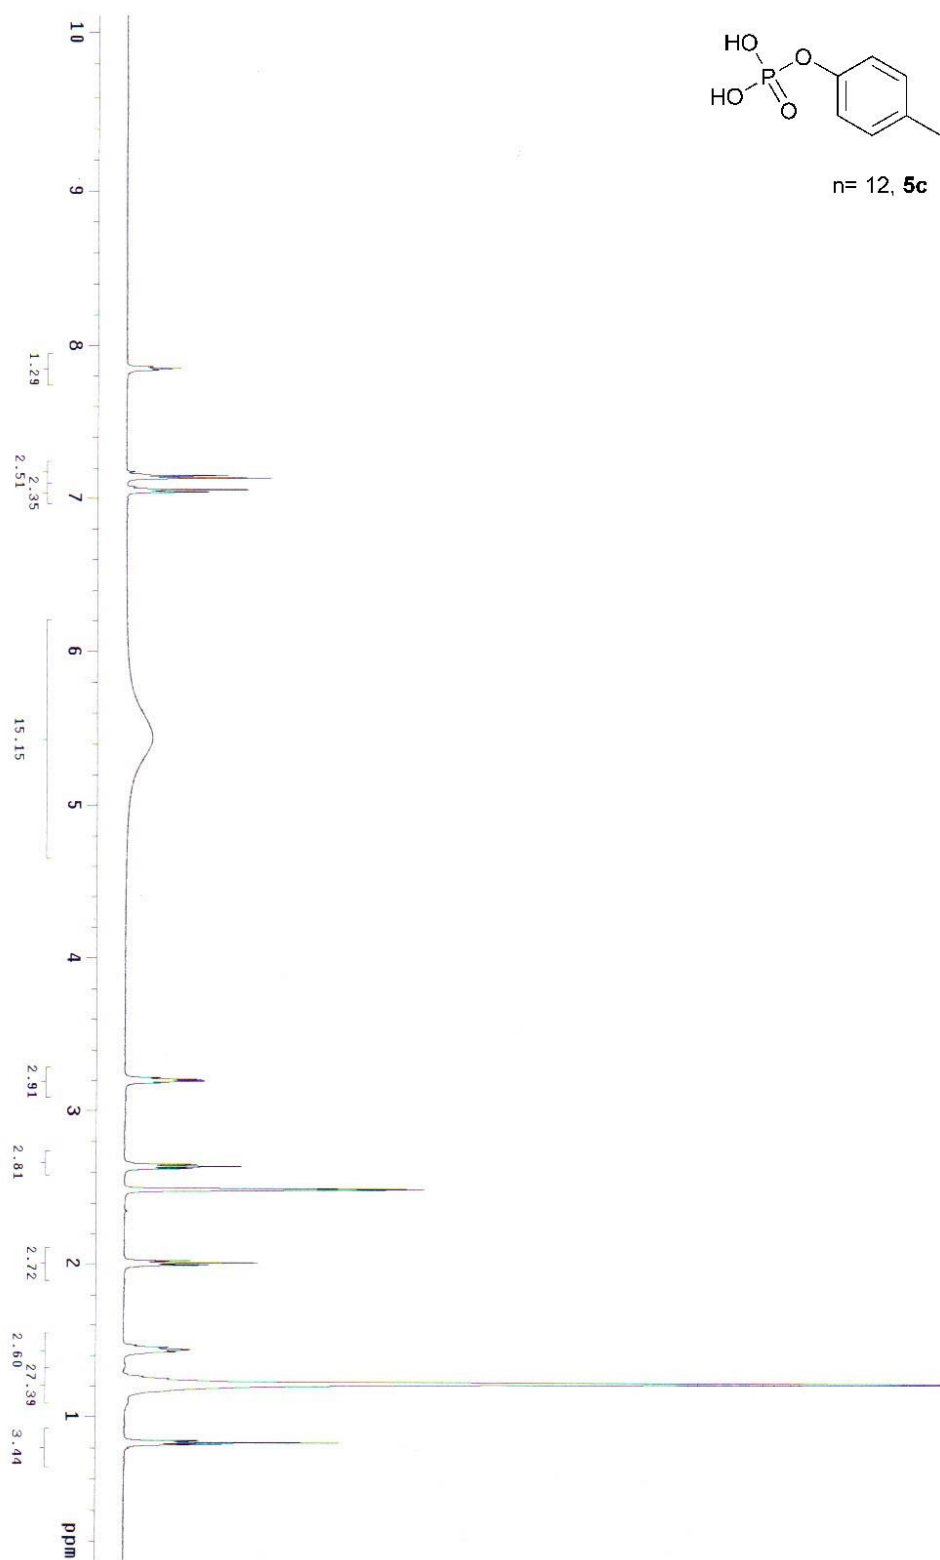

**<sup>13</sup>C NMR**

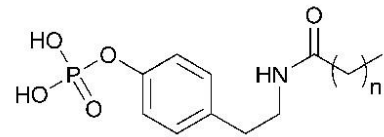

n = 12, 5c

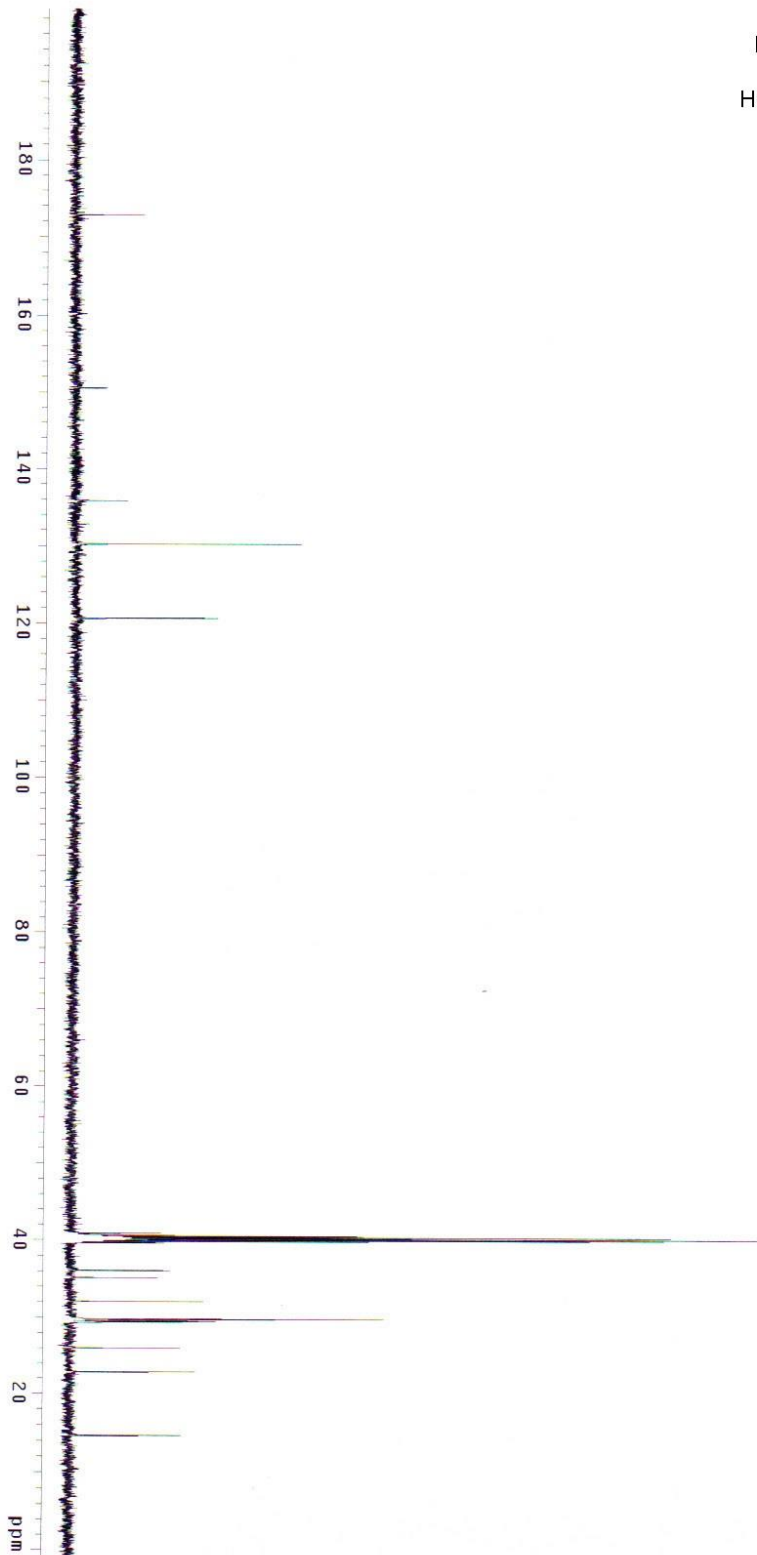

### <sup>31</sup>P NMR

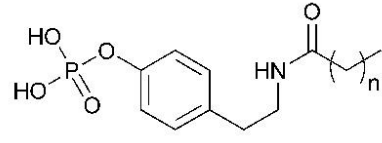

n = 12, 5c

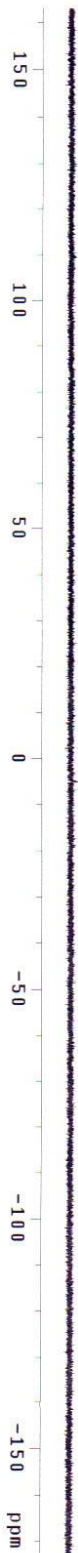

| INDEX | FREQUENCY | PPM    | HEIGHT |
|-------|-----------|--------|--------|
| 1     | -1025.168 | -5.067 | 29.5   |
